# Supplementary material for: Reducing the anticholinergic and sedative load in older patients on polypharmacy by pharmacist-led medication review: a randomised controlled trial
Source: PubMed Central journal article supplement — BMJ Open. 2018 Jul 19;8(7):e019042. doi: 10.1136/bmjopen-2017-019042 (PMC6059312; doi:10.1136/bmjopen-2017-019042), 2018-07-19
Supplement: bmjopen-2017-019042.draft_revisions.pdf [file bmjopen-2017-019042.draft_revisions.pdf]

# BMJ Open

BMJ Open is committed to open peer review. As part of this commitment we make the peer review history of every article we publish publicly available.

When an article is published we post the peer reviewers' comments and the authors' responses online. We also post the versions of the paper that were used during peer review. These are the versions that the peer review comments apply to.

The versions of the paper that follow are the versions that were submitted during the peer review process. They are not the versions of record or the final published versions. They should not be cited or distributed as the published version of this manuscript.

BMJ Open is an open access journal and the full, final, typeset and author-corrected version of record of the manuscript is available on our site with no access controls, subscription charges or pay-per-view fees (<http://bmjopen.bmj.com>).

If you have any questions on BMJ Open's open peer review process please email [info.bmjopen@bmj.com](mailto:info.bmjopen@bmj.com)

# BMJ Open

## Reducing the burden of anticholinergic and sedative medication in older patients on polypharmacy by medication review: A randomized controlled trial

|                               |                                                                                                                                                                                                                                                     |
|-------------------------------|-----------------------------------------------------------------------------------------------------------------------------------------------------------------------------------------------------------------------------------------------------|
| Journal:                      | <i>BMJ Open</i>                                                                                                                                                                                                                                     |
| Manuscript ID                 | bmjopen-2017-019042                                                                                                                                                                                                                                 |
| Article Type:                 | Research                                                                                                                                                                                                                                            |
| Date Submitted by the Author: | 08-Aug-2017                                                                                                                                                                                                                                         |
| Complete List of Authors:     | van der Meer, Helene; University of Groningen, Wouters, Hans; University of Groningen Pont, Lisa; Macquarie University, Centre for Health Systems and Safety Res Taxis, Katja; University of Groningen, Faculty of Mathematics and Natural Sciences |
| Keywords:                     | AGED, DRUG BURDEN INDEX, MEDICATION REVIEW, MUSCARINIC ANTAGONISTS, POLYPHARMACY                                                                                                                                                                    |
|                               |                                                                                                                                                                                                                                                     |

SCHOLARONE™  
Manuscripts

1  
2  
3 **Reducing the burden of anticholinergic and sedative medication in older**  
4 **patients on polypharmacy by medication review: A randomized controlled**  
5 **trial**  
6  
7  
8  
9  
10

- 11 1. Helene G van der Meer\*, MSc, Groningen Research Institute of Pharmacy, Unit of  
12 Pharmacotherapy, -Epidemiology & -Economics, University of Groningen, Antonius  
13 Deusinglaan 1, 9713 AV Groningen, The Netherlands. Email: h.g.van.der.meer@rug.nl  
14  
15 2. Hans Wouters, PhD, Groningen Research Institute of Pharmacy, Unit of Pharmacotherapy, -  
16 Epidemiology & -Economics, University of Groningen, Groningen, The Netherlands.  
17  
18 3. Lisa G Pont, PhD, Centre for Health Systems and Safety Research, Australian Institute of Health  
19 Innovation, Macquarie University, Sydney, Australia.  
20  
21 4. Katja Taxis, PhD, Groningen Research Institute of Pharmacy, Unit of Pharmacotherapy, -  
22 Epidemiology & -Economics, University of Groningen, Groningen, The Netherlands.  
23  
24

25 \*Corresponding author.  
26  
27  
28

29 **Keywords:** aged; drug burden index; medication review; muscarinic antagonists; polypharmacy  
30

31 **Word count:** 3166  
32

33 **Tables:** 3  
34

35 **Figure:** 1  
36  
37  
38  
39  
40  
41  
42  
43  
44  
45  
46  
47  
48  
49  
50  
51  
52  
53  
54  
55  
56  
57  
58  
59  
60

## ABSTRACT

### OBJECTIVE

To evaluate whether medication review is effective at reducing anticholinergic and sedative burden as measured by the Drug Burden Index (DBI).

### DESIGN

Randomised controlled single blind trial.

### SETTING

15 community pharmacies in the Northern Netherlands.

### PARTICIPANTS

157 community-dwelling patients aged  $\geq 65$  years who used  $\geq 5$  medicines for  $\geq 3$  months, including at least one psycholeptic or psychoanaesthetic medication, and having a DBI  $\geq 1$ .

### INTERVENTION

A medication review by the community pharmacist in collaboration with the patient's general practitioner and patient.

### PRIMARY AND SECONDARY OUTCOMES MEASURES

The primary outcome was the proportion of patients whose DBI decreased by at least 0.5. Secondary outcomes were the presence of anticholinergic and/or sedative side effects, falls, cognitive function, activities of daily living, quality of life, hospital admission, and mortality. Data were collected at baseline and three-months follow-up.

### RESULTS

Mean participant age was 75.7 (SD, 6.9) years in the intervention arm and 76.6 (SD, 6.7) years in the control arm, and the majority were female (respectively 69.3% and 72.0%). Linear mixed model analysis showed no difference in the proportion of patients with a  $\geq 0.5$  decrease in DBI between intervention arm (17.3%) and control arm (15.9%), (OR 1.04, CI 0.47 to 2.64,  $p=0.927$ ). Intervention patients scored higher on the digit symbol substitution test, measure of cognitive function, (OR 2.02, CI 1.11 to 3.67,  $p=0.021$ ), and reported fewer sedative side effects (OR 0.61, CI 0.40 to 0.94,  $p=0.024$ ) at follow-up.

### CONCLUSIONS

1  
2  
3 Medication review is not effective in reducing the burden of anticholinergic/sedative medication  
4 measured with the DBI. Preventive strategies, signalling a rising burden and taking action before  
5 chronic use of anticholinergic and/or sedative medication is established, may be more successful.  
6  
7

## 8 **TRIAL REGISTRATION**

9  
10 Clinical trials NCT02317666.  
11  
12  
13

## 14 **STRENGTHS AND LIMITATION OF THIS STUDY**

- 16  
17 • A successfully completed randomized controlled trial, which was the first to focus on  
18 changing anticholinergic and sedative medication load by medication review.
- 19  
20 • Appropriately powered to detect a clinically relevant medium difference.
- 21  
22 • Showing the effect of “real world” practiced medication review, rather than the theoretical  
23 approach described in guidelines.
- 24  
25 • Three-months follow-up might have been too short to detect full effects of medication review,  
26  
27 e.g. due to stepwise reduction of medication, however very few dosage changes were seen.  
28  
29  
30  
31  
32  
33  
34  
35  
36  
37  
38  
39  
40  
41  
42  
43  
44  
45  
46  
47  
48  
49  
50  
51  
52  
53  
54  
55  
56  
57  
58  
59  
60

## BACKGROUND

Older people suffer from many medical conditions and use more medication than any other age group. Multiple medication use in combination with age-related physiological changes increase the risk of medication related harm including adverse drug events, drug-drug- and drug-disease-interactions.<sup>1</sup> Medications with anticholinergic and/or sedative properties are of particular concern in older people, because they worsen cognitive impairment and physical functioning, increase the risk of falls and negatively impact activities of daily living, hospitalization, and mortality.<sup>23</sup> Despite the risks, these medications are commonly prescribed to older individuals.<sup>4</sup> Different measures have been developed to quantify the anticholinergic burden in patients.<sup>5</sup> The Drug Burden Index (DBI) determines an individual's exposure to anticholinergic and sedative medication taking into account the dose.<sup>67</sup> A high DBI has been associated with impairments in both physical- and cognitive function among older individuals.<sup>8</sup> Hence, decreasing exposure to anticholinergic and sedative medication, as measured by the DBI, may have important health benefits in older people.

Two small Australian studies suggest that medication review could be a promising strategy in reducing the DBI.<sup>910</sup> A medication review is a structured assessment of a patient's medication by the community pharmacist in collaboration with the general practitioner (GP) and patient, in order to optimize prescribing.<sup>11</sup> While meta-analyses of studies in different settings show a lack of effectiveness on outcomes such as mortality or hospital (re-) admissions,<sup>12-14</sup> these studies included different types of medication review. Well-structured medication review with good cooperation between pharmacist and GP and involvement of the patient were most likely to be successful.<sup>1516</sup> Furthermore fee-for-pharmacist-led medication review seemed to have positive health benefits on the patient.<sup>17</sup> The most effective method for medication review remains unknown. Focusing on specific subgroups such as older people with multiple comorbidities and polypharmacy,<sup>18</sup> or patients suffering from pain<sup>19</sup> may be one strategy to optimize medication review associated benefits. To date, there is no consensus on the effectiveness of medication review as a strategy to reduce anticholinergic and sedative burden as measured by the DBI. Therefore, the primary aim of this study was to evaluate if a medication review is an effective strategy to reduce anticholinergic and sedative burden as measured by the DBI. Secondly, we evaluated the effect of a medication review on patient outcomes including cognitive function, risk of falls, activities of daily living and quality of life.

## METHODS

### Study design, setting & participants

We conducted a randomized controlled, single blind trial in 15 community pharmacies from December 2014 until October 2015 in the Northern Netherlands. Pharmacies were recruited via the regional

1  
2  
3 association of pharmacists and per pharmacy one pharmacist was concerned with this study.  
4 Pharmacists were experienced in performing medication reviews and had an established working  
5 collaboration with GPs in the area. Patients who were aged  $\geq 65$  years, living independently, using  $\geq 5$   
6 medications for  $\geq 3$  months, including at least one psycholeptic or psychoanaleptic medication  
7 (Anatomic Therapeutic Classification (ATC) code N05 or N06),<sup>20</sup> and with a DBI  $\geq 1$  were identified  
8 by the pharmacist and invited to participate in the study. Exclusion criteria were limited life  
9 expectancy ( $< 3$  months), non-Dutch language speaker or advanced dementia. Patients who received a  
10 medication review within the past 9 months before the study period and patients who needed a  
11 medication review urgently were also excluded. Exclusion criteria were identified by the pharmacist.  
12 This study was approved by the Medical Ethical Committee of the University Medical Centre of  
13 Groningen, The Netherlands (protocol number METc 2014/392). The study protocol has been  
14 published elsewhere.<sup>21</sup>

### 21 **Randomization, allocation & blinding**

22 Eligible patients were approached by the pharmacist and asked to provide written informed consent. In  
23 each pharmacy, patients willing to participate were then matched in pairs by gender, age, DBI and  
24 number of medications. One patient of each pair was randomly assigned to the intervention condition.  
25 All participants gave written consent prior to the intervention allocation. The randomization process  
26 was conducted by the principal investigator, who was not involved in recruitment or data collection.  
27 The researchers who enrolled the patients and collected the data were kept blind to the allocation.  
28 Pharmacists and patients could not be kept blind. Therefore this was a single blind study.

### 34 **Intervention**

35 The intervention was a medication review conducted by the community pharmacist in close  
36 collaboration with the patient's GP and, if needed, other medical specialists. The medication review,  
37 as described by Dutch guidelines comprised five steps. [11] First, the pharmacotherapeutical  
38 anamnesis, a face-to-face consultation between pharmacist and patient to discuss the medication use.  
39 Second, the pharmacotherapeutical medication review, the pharmacist identified  
40 pharmacotherapeutical problems and drafted recommendations for medication optimisation to discuss  
41 with the patients GP. Third, a multidisciplinary meeting, preferably face-to-face, between pharmacist  
42 and GP about the patients' medication and draft of a pharmaceutical action plan. Fourth, discussion of  
43 the pharmaceutical action plan between patient and pharmacist or GP. Patients' expectations and  
44 wishes were key elements in the decision-making process. Fifth, a follow-up of the pharmaceutical  
45 action plan. A detailed description of the guideline can be found in our previously published study  
46 protocol.<sup>21</sup> Pharmacists were familiar with the guideline, as medication reviews were widely  
47 performed and partly mandatory by agreements with health insurance companies. Nonetheless, we  
48 provided the guidelines to the pharmacists with the request to focus on anticholinergic and sedative  
49 medications. In order to get a reflection of 'real world' practice, we let the pharmacists perform the  
50  
51  
52  
53  
54  
55  
56  
57  
58  
59  
60

1  
2  
3 medication review as they used to do, but we did check whether all steps were conducted. The  
4 medication review took place within days after the baseline measurement for the intervention patients.  
5 Patients in the control group received the medication review after the study period. Costs of the  
6 medication review were reimbursed by the patient's health insurance.  
7  
8

### 9 **Outcomes**

10 The primary outcome was defined as the difference in proportion of patients having a decrease of DBI  
11  $\geq 0.5$  at 3-months follow-up. Our hypothesis was that this proportion would be higher in the  
12 intervention arm compared to the control arm. We chose 0.5, as this equals the cessation of one drug,  
13 which we considered clinically relevant. The DBI was calculated using the following formula <sup>7</sup>:

$$14 \text{ DBI} = \sum \frac{D}{D + \delta}$$

15  
16 D = daily dose,  $\delta$  = minimum recommended daily dose were derived for the study from Dutch  
17 standard reference sources.<sup>22,23</sup> Except for sensory and dermatological preparations, all chronic  
18 medications (i.e. those used for  $\geq 3$  months) with anticholinergic properties (dry mouth, constipation  
19 and urine retention) and sedative properties based on Dutch standard reference sources <sup>22-24</sup> were  
20 included in the calculation. Medication data were derived from electronic pharmacy dispensing data  
21 and were verified with the patient.  
22  
23  
24  
25  
26  
27  
28  
29

30 We included the following secondary outcomes: anticholinergic side effects, measured by the Udvalg  
31 for Kliniske Undersogelser (UKU) side effect rating scale,<sup>25</sup> sedative side effects, derived from a  
32 patient-reported adverse drug event questionnaire,<sup>26</sup> and risk of falls, determined by the Up & Go test.  
33  
34 <sup>27</sup> Cognitive function was measured using validated tests for memory and executive function, namely  
35 the Seven Minute Screen (7MS),<sup>28</sup> the Trailmaking Test A & B,<sup>29</sup> and Digit Symbol Substitution Test  
36 (DSST).<sup>30</sup> The latter has also previously been used to examine the validity of the DBI.<sup>7</sup> Activities of  
37 daily living were derived using the validated Groningen Activity Restriction Scale (GARS),<sup>31,32</sup> and  
38 quality of life was measured by the Euroqol-5 Dimension-3 Level (EQ-5D-3L) questionnaire,  
39 including visual analogue scale (VAS).<sup>33</sup> All tools were administered in Dutch and data were collected  
40 in a standardized manner, using data collection sheets, by researchers who were trained by a  
41 psychologist. Data collection took place at baseline and 3-months follow-up for both allocations.  
42 Patients with the inability to walk were excluded from the Up&Go test and the GARS questionnaire.  
43 At follow-up the number of fall incidents, hospital admission, and mortality was assessed based on  
44 patient/relative reporting.  
45  
46  
47  
48  
49  
50

### 51 **Sample size calculation**

52 To the best of our knowledge, only one randomized pilot study has been conducted assessing the DBI.  
53  
54 <sup>10</sup> We therefore could not calculate the sample size 'a priori'. However we estimated a sample size  
55 based on a power of 80% at a significance of 0.05 and an intraclass correlation coefficient up to 0.2 to  
56  
57  
58  
59  
60



1  
2  
3 detect a medium effect size on the primary outcome.<sup>34</sup> We chose a medium effect size as we  
4 considered a small effect size to be not clinically relevant and a power to detect a medium effect size  
5 also to be capable of detecting a large effect size. For this calculation around 160 participants (80 in  
6 control arm and 80 in intervention arm) were needed. We expected a non-response rate of 60% and  
7 therefore aimed to invite 400 patients to participate in the study.  
8  
9

### 10 **Statistical analysis**

11 We performed two analyses. In the first analysis we included all patients with a baseline measurement.  
12 In the second analysis, we included all patients who were not lost to follow-up, and who received the  
13 intervention as allocated. Descriptive statistics were calculated for both allocation arms at baseline.  
14 For the analysis of the primary outcome, we initially considered a generalized linear mixed model to  
15 adjust for dependence of observations (i.e. patients within pharmacies). However, as the intraclass  
16 correlation was not significant, extension of the model with random effects at the level of pharmacies  
17 was not necessary. Therefore only fixed effects were considered and standard regression models were  
18 applied. Most secondary outcomes were examined with linear mixed models. Depending on whether  
19 these were continuous, dichotomous, or count variables and their distribution was normal, we  
20 employed linear regression, logistic regression, or negative binomial regression. Variables with a  
21 skewed distribution were transformed before analysis. The Trailmaking Test A&B were log-  
22 transformed. Transformation did not normalize the distribution of the GARS and EQ-5D, we therefore  
23 dichotomized these data (cut-off points were 36 and 0.5 respectively). From the 7MS test, the Benton  
24 temporal orientation test had floor-effects, and the clock drawing and cued recall tests had ceiling-  
25 effects, therefore these variables were also dichotomized (cut-off points were 4, 6 and 15 respectively).  
26 Because of the high variance in the DSST, we ranked the scores per 5 percentiles and used these data  
27 in the analysis. For dichotomous variables we report percentages and numbers of patients in the  
28 highest scoring group, for skewed variables we report on the median and interquartile range and for  
29 normally distributed data we report the mean and standard deviation. Reported falls and  
30 hospitalization could be assessed from all patients who had a follow-up measurement and were  
31 analysed using Fisher's exact test, and we report the number and percentages of patients. Mortality  
32 was analysed in a similar way. We performed a sensitivity analysis on outliers and all analyses were  
33 adjusted for gender, age, and number of medication at baseline. Secondary outcomes were also  
34 adjusted for baseline scores. Analyses were done in SPSS 24 and MLwiN 2.36, statistical tests were  
35 one-sided and conducted on 5% significance level.  
36  
37  
38  
39  
40  
41  
42  
43  
44  
45  
46  
47  
48  
49

### 50 **Missing data**

51 Few data were missing for the primary outcome. For two patients, medication use at follow-up was  
52 unknown (lost to follow-up), therefore the baseline observation for medication use was carried  
53 forward. For eight patients, medication use could not be verified with the patient, as they could not be  
54 reached by telephone despite several attempts. For these patients, the medication data from the  
55  
56  
57  
58  
59  
60

pharmacy dispensing system were used. For secondary outcomes, 5.3% of data were missing in the complete dataset, mostly at follow-up (4.8%). In the intervention arm, 7.0% of data was missing (6.1% at follow-up) across 18 patients, whereas in the control arm 3.7% was missing (3.4% at follow-up) across 12 patients. In total 30 patients had missing data, of whom two were lost to follow-up. Eight patients were not able to complete one or more cognitive tests (0.5% of all data). Eleven patients could not be tested at follow-up within the study period, six patients due to sickness, four patients due to practical reasons (despite numerous attempts we were unsuccessful to arrange an appointment for the follow-up measurement), and one patient had died two days before the follow-up appointment. A few data were missing for other reasons across nine patients, for example patients forgetting their glasses, due to time constraints, or other reasons.

Missing data in cognitive tests due to inability of the patient to complete the task were replaced with the worst score for that specific group. Missing data of patients who could not be tested at follow-up within the study period, or who had missing data for other reasons were replaced by multiple imputation (five times) in SPSS 24. In this paper we report on the imputed dataset. Sensitivity analysis showed no difference between the dataset with and without missing data.

## RESULTS

### Participant flow

Overall, 498 patients were approached for participation, 164 patients provided informed consent (32.9% response rate), and 157 patients completed at least the baseline measurement. The baseline drop-out rate was 4.3% (Figure 1).

### Participant characteristics

The average participant age was 75.7 (SD, 6.9) years in the intervention arm and 76.6 (SD, 6.7) years in the control arm, and the majority were female (respectively 69.3% and 72.0%). Participants in the control arm used slightly more medicines at baseline (9.3 (SD, 3.2) to 8.4 (SD,2.4)), and more control patients were living with a partner (53.6% to 44%) (Table 1).

Table 1 Demographic characteristics at baseline.

|                               | Intervention (n=75) | Control (n=82) |
|-------------------------------|---------------------|----------------|
| <b>Age (years)</b>            | 75.7 (6.9)          | 76.6 (6.7)     |
| <b>Sex (female) (n (%))</b>   | 52 (69.3)           | 59 (72.0)      |
| <b>Number of medicines</b>    | 8.4 (2.4)           | 9.3 (3.2)      |
| <b>DBI</b>                    | 3.1 (1.0)           | 3.2 (1.0)      |
| <b>Marital status (n (%))</b> |                     |                |

|                                                   |                                        |            |            |
|---------------------------------------------------|----------------------------------------|------------|------------|
|                                                   | <b>Partner</b>                         | 33 (44.0%) | 44 (53.6%) |
|                                                   | <b>Widow/widower/Divorced/single</b>   | 34 (45.3%) | 32 (39.0%) |
|                                                   | <b>Unknown</b>                         | 8 (10.6%)  | 6 (7.3%)   |
| <b>Level of education (n (%))</b>                 |                                        |            |            |
|                                                   | <b>No/ low/ middle</b>                 | 58 (77.3%) | 64 (78.0%) |
|                                                   | <b>High</b>                            | 9 (12.0%)  | 13 (15.8%) |
|                                                   | <b>Unknown</b>                         | 8 (10.6%)  | 5 (6.0%)   |
| <b>Medication use at baseline (top 5 (n (%)))</b> |                                        |            |            |
|                                                   | <b>ATC Nervous system</b>              | 75 (100%)  | 82 (100%)  |
|                                                   | <b>ATC Cardiovascular</b>              | 70 (93.3%) | 74 (90.2%) |
|                                                   | <b>ATC Alimentary tract</b>            | 64 (85.3%) | 71 (86.6%) |
|                                                   | <b>ATC Blood/ blood forming organs</b> | 49 (65.3%) | 46 (56.1%) |
|                                                   | <b>ATC Respiratory tract</b>           | 20 (26.7%) | 38 (46.3%) |

\*Data are means (SD) or numbers (%)

### Primary outcome

In the first analysis, which included all patients with a baseline measurement, a higher proportion of patients in the intervention group had a decrease of DBI  $\geq 0.5$  (17.3% to 15.9%, OR 1.04, CI 0.47 to 2.64,  $p=0.927$ ), however this finding was not statistically significant. Similar results were obtained in the second analysis, which included all patients who were not lost to follow-up, and who received the intervention as allocated (Table 2).

Table 2: Proportion of patients having a decrease in DBI  $\geq 0.5$  by analysis type

|                                      | Proportion with decrease of DBI $\geq 0.5$ (% , n) |            | Odds ratio (95% CI)<br>* | p-value |
|--------------------------------------|----------------------------------------------------|------------|--------------------------|---------|
|                                      | Intervention                                       | Control    |                          |         |
| First analysis <sup>#</sup> (n=157)  | 17.3% (13)                                         | 15.9% (13) | 1.04 (0.47 to 2.64)      | 0.927   |
| Second analysis <sup>+</sup> (n=145) | 18.5% (12)                                         | 16.3% (13) | 1.09 (0.45 to 2.63)      | 0.857   |

\* Binary logistic regression, adjusted for age, gender, number of medication at baseline.

First analysis: all patients with a baseline measurement

Second analysis: all patients who were not lost to follow-up, and who received the intervention as allocated

### Secondary outcome

Secondary outcomes were analysed including all patients who were not lost to follow-up and who received the intervention as allocated (Table 3). A difference was seen in the DSST and reporting of sedative side effects between allocation arms. Patients in the intervention arm scored higher at follow-

up on average (3 (SD, 1) to 1 (SD, 0) point (s), OR 2.02, CI 1.11 to 3.67, p=0.021) and reported less sedative side effects at follow up compared to the control arm (-1 (IQR, -2) to 1 (IQR, 0) point(s), OR 0.61, CI 0.40 to 0.94, p=0.024). For all other secondary outcomes no difference was found between intervention and control arm.

Table 3: Secondary outcomes at follow-up

|                                                     | Intervention (n=65) |                         | Control (n=80) |                         | Adjusted difference at follow-up (95% CI) |
|-----------------------------------------------------|---------------------|-------------------------|----------------|-------------------------|-------------------------------------------|
|                                                     | Baseline            | Difference at follow-up | Baseline       | Difference at follow-up |                                           |
| <b>Trailmaking Test A<sup>†</sup></b>               | 59 (37)             | -8 (-5)                 | 61 (28)        | -6 (2)                  | 0.99 (0.90 to 1.09)                       |
| <b>Trailmaking Test B<sup>†</sup></b>               | 149 (103)           | -4 (24)                 | 152 (103)      | 1 (19)                  | 0.99 (0.87 to 1.11)                       |
| <b>DSST</b>                                         | 36 (12)             | 3 (1)                   | 36 (13)        | 1 (0)                   | 2.02 (1.11 to 3.67)*                      |
| <b>7MS: enhanced cued recall<sup>‡</sup></b>        | 85 (55)             | 0 (0)                   | 84 (71)        | 5 (4)                   | 0.54 (0.15 to 1.90)                       |
| <b>7MS: Benton temporal orientation<sup>‡</sup></b> | 95 (62)             | -3 (-2)                 | 99 (79)        | -4 (-3)                 | 1.38 (0.28 to 6.88)                       |
| <b>7MS: clock drawing<sup>‡</sup></b>               | 80 (52)             | -8 (-5)                 | 86 (69)        | -6 (-5)                 | 0.67 (0.28 to 1.62)                       |
| <b>7MS: verbal fluency</b>                          | 16 (5)              | 0 (-1)                  | 16 (5)         | 0 (0)                   | 0.84 (0.21 to 3.28)                       |
| <b>GARS<sup>‡</sup> □</b>                           | 72 (46)             | 2 (-1)                  | 69 (54)        | 0 (0)                   | 1.73 (0.62 to 4.84)                       |
| <b>Sedative side effects<sup>†</sup></b>            | 3 (5)               | -1 (-2)                 | 2 (4)          | 1 (0)                   | 0.61 (0.40 to 0.94)*                      |
| <b>UKU<sup>†</sup></b>                              | 17 (22)             | -3 (1)                  | 18 (27)        | -2 (-2)                 | 0.97 (0.67 to 1.39)                       |
| <b>EQ-5D-3L<sup>‡</sup></b>                         | 74 (48)             | 9 (6)                   | 76 (61)        | 4 (3)                   | 1.02 (0.95 to 1.09)                       |
| <b>VAS</b>                                          | 6.5 (1.5)           | 0 (0)                   | 7.0 (1.5)      | 0 (0)                   | 0.91 (0.61 to 1.37)                       |
| <b>Up&amp;Go<sup>‡</sup> □</b>                      | 66 (42)             | 0 (0)                   | 64 (50)        | 4 (3)                   | 1.37 (0.60 to                             |

3.14)

Data are given as means (standard deviation (SD)), median<sup>†</sup> (interquartile range (IQR)), and percentage (number) of patients in higher scoring group<sup>‡</sup>. DSST = Digit Symbol Substitution Test, 7MS = Seven Minute Screen, GARS = Groningen Activities Restriction Scale, UKU = Udvalg for Kliniske Undersogelser (measuring anticholinergic side effects), VAS = visual analogue scale (part of EQ-5D-3L). \*Statistically significant difference (based on linear mixed model analysis,  $p < 0.05$ , adjusted for age, gender, number of medication at baseline). □ Deviation of number of patients, as 3 patients were excluded for this test/questionnaire:  $n=64$  for intervention,  $n=78$  for control.

Of all 144 patients, who did have a follow-up meeting, 60 falls were reported across 34 patients (15 in control arm (19.5%) and 19 from intervention arm (28.4%)). No significant relationship was found between reported falls and allocation ( $p=0.146$ ). There was also no difference found between control- and intervention arm in hospitalization, 9 (11.7%) to 3 (4.5%) patients reported unplanned hospital admission, ( $p=0.103$ ) and mortality, 1 (1.2%) to 1 (1.3%) patient died, ( $p=0.732$ ).

## DISCUSSION

We found that in our study medication review did not reduce the anticholinergic and/or sedative medication load in older people. In addition, medication review did not improve cognitive function, apart from the DSST. We also found that medication review had no effect on anticholinergic side effects, quality of life, activities of daily living, risk of falls, hospitalization, and mortality. However, intervention patients reported fewer sedative side effects.

### Strengths and limitations of the study

This randomized controlled trial was the first to focus on changing anticholinergic and sedative medication load by medication review. The trial was completed successfully, allocation arms were comparable and we achieved a medium response rate, yet there are some methodological limitations that should be considered when interpreting our findings. First, the wide confidence intervals of our primary outcome suggest the study was underpowered to detect a small effect. However, we believe our study was appropriately powered to detect a clinically relevant medium difference between intervention and control arm. Second, although we did check whether all steps of the medication review were conducted, it was outside the scope of our study to investigate to what extent pharmacists adhered to communication methods recommended by the guideline on performing the medication review. Informal conversations with pharmacists suggested that although the guidelines insist on a face-to-face meeting between the pharmacist and GP, some pharmacists contacted the GP by phone, fax, or email due to lack of time. This might have had an effect on the implementation of medication suggestions,<sup>16</sup> but we believe that our results reflect “real-world” practice of how medication reviews

1  
2  
3 are carried out in Dutch health care practice. Third, we followed patients for three months after the  
4 intervention. One could suggest that more time was needed to determine the effect of the intervention,  
5 as changes in medication use may require more time, for example withdrawing of medication by step-  
6 wise reduction of dosing. However we found no indication for this, as few dosage changes were seen.  
7  
8

### 9 **Comparison with other studies**

10 The medication changes in both groups were comparable, suggesting that these reflect fluctuations of  
11 medication use over time as prescribing is a dynamic rather than a static process. We do not know the  
12 pattern of fluctuations in anticholinergic and sedative medication prescribing; this should be explored  
13 in longitudinal studies. Our results are in line with a number of meta-analyses, which also reported a  
14 lack of effect of medication reviews on a variety of patient outcomes.<sup>12-14</sup> Our results are in contrast to  
15 a number of studies, which found medication reviews to be effective in specific subgroups of patients  
16 with multiple comorbidities, polypharmacy and pain.<sup>1819</sup> The medication reviews in these studies  
17 however were not specifically focusing on medication with anticholinergic and/or sedative properties  
18 as we did. Two small Australian studies suggest that the DBI can be lowered, but these studies were  
19 based on pharmacist recommendations and did not investigate actual implementation of these by the  
20 GP.<sup>910</sup> Although some lowering of the DBI was seen, the latter study did find that GPs had difficulties  
21 in changing medications, for example with those medications initiated by specialists. A recent study  
22 also showed that while it was possible to optimize use for a number of medication classes,  
23 psychotropic medications were among the most difficult to adjust.<sup>35</sup> So, despite guidance how to  
24 reduce anticholinergic and sedative medication,<sup>36-38</sup> as highlighted by our findings, there seem to be  
25 important barriers preventing reduction in clinical practice.  
26  
27  
28  
29  
30  
31  
32  
33  
34

### 35 **Conclusions and implications for practice**

36 Using the DBI, a highly vulnerable population group in need of medication optimization can be  
37 identified. The current strategy of multidisciplinary medication review does not appear effective in  
38 reducing the DBI. Despite some practical issues with the DBI, such as the lack of an international  
39 consensus-based list of anticholinergic/sedative medication including minimum doses,<sup>39</sup> we suggest to  
40 use the DBI as a tool to identify harmful medication users. This approach may be suitable for other  
41 patient groups and in other settings such as nursing homes.<sup>40</sup> Enlarging the multidisciplinary team  
42 should also be considered, for example psychiatrists advising GPs on lowering or ceasing medication  
43 and psychologists assisting patients during withdrawal. Furthermore, signalling a rising burden and  
44 taking action before chronic use of medication with anticholinergic and/or sedative properties is  
45 established may be the preferred approach.  
46  
47  
48  
49  
50  
51  
52  
53  
54  
55  
56  
57  
58  
59  
60

## ACKNOWLEDGEMENTS

We thank Marjolein Deurloo, Laura Hellemans and Floor Hulshof for helping with the data collection.

### Funding

This study was supported by the Dutch Pharmacy Society “Koninklijke Nederlandse Maatschappij ter bevordering der Pharmacie” (KNMP), grant number 14b.27. The funder had no involvement in the study design; in the collection, analysis and interpretation of the data; in the writing of the report; and in the decision to submit the paper for publication.

### Competing interests

All authors have completed the ICMJE uniform disclosure form at [www.icmje.org/coi\\_disclosure.pdf](http://www.icmje.org/coi_disclosure.pdf) and declare: no support from any organisation for the submitted work; no financial relationships with any organisations that might have an interest in the submitted work in the previous three years; no other relationships or activities that could appear to have influenced the submitted work.

### Contributors

KT initiated the study and HW and HGvdM contributed to the study conception, design, and to the intervention development. HGvdM, HW and KT reviewed the study parameters and contributed to the analysis plan; obtained ethical approval. KT did randomisation. HGvdM led the trial and collected the data. HGvdM and HW did the statistical analysis with input from KT. All authors contributed to the interpretation of the results. HGvdM drafted the manuscript. All the authors revised and approved the final manuscript. KT is the guarantor.

### Data sharing

Data are available from corresponding author on request.

### Ethics approval

This study was approved by the Medical Ethical Committee of the University Medical Centre of Groningen (protocol number METc 2014/392; in Dutch: Medisch Ethische Toetsingscommissie van het Universitair Medisch Centrum Groningen [METc UMCG]). Participants provided written informed consent before participating in the study.

## REFERENCES

1. Taxis K, O'Sullivan D, Cullinan S, Byrne S. Drug utilization in older people. In: Elseviers M, Wettermark B, Almarsdóttir AB, et al, editor. Drug utilization research: Methods and applications London: Wiley-Blackwell; 2016. p. Chapter 25
2. Fox C, Smith T, Maidment I, Chan WY, Bua N, Myint PK, et al. Effect of medications with anticholinergic properties on cognitive function, delirium, physical function and mortality: a systematic review. *Age Ageing* 2014 Sep;43(5):604-615
3. Park H, Satoh H, Miki A, Urushihara H, Sawada Y. Medications associated with falls in older people: systematic review of publications from a recent 5-year period. *Eur J Clin Pharmacol* 2015 Dec;71(12):1429-1440
4. Bell JS, Mezrani C, Blacker N, LeBlanc T, Frank O, Alderman CP, et al. Anticholinergic and sedative medicines - prescribing considerations for people with dementia. *Aust Fam Physician* 2012 Jan-Feb;41(1-2):45-49
5. Pont LG, Nielen JT, McLachlan AJ, Gnjidic D, Chan L, Cumming RG, et al. Measuring anticholinergic drug exposure in older community-dwelling Australian men: a comparison of four different measures. *Br J Clin Pharmacol* 2015 Nov;80(5):1169-1175
6. Cardwell K, Hughes CM, Ryan C. The Association Between Anticholinergic Medication Burden and Health Related Outcomes in the 'Oldest Old': A Systematic Review of the Literature. *Drugs Aging* 2015 Oct;32(10):835-848
7. Hilmer SN, Mager DE, Simonsick EM, Cao Y, Ling SM, Windham BG, et al. A drug burden index to define the functional burden of medications in older people. *Arch Intern Med* 2007 Apr 23;167(8):781-787
8. Ruxton K, Woodman RJ, Mangoni AA. Drugs with anticholinergic effects and cognitive impairment, falls and all-cause mortality in older adults: A systematic review and meta-analysis. *Br J Clin Pharmacol* 2015 Aug;80(2):209-220
9. Castelino RL, Hilmer SN, Bajorek BV, Nishtala P, Chen TF. Drug Burden Index and potentially inappropriate medications in community-dwelling older people: the impact of Home Medicines Review. *Drugs Aging* 2010 Feb 1;27(2):135-148
10. Gnjidic D, Le Couteur DG, Abernethy DR, Hilmer SN. A pilot randomized clinical trial utilizing the drug burden index to reduce exposure to anticholinergic and sedative medications in older people. *Ann Pharmacother* 2010 Nov;44(11):1725-1732
11. Nederlands Huisartsen Genootschap (NHG) [Multidisciplinary guideline on polypharmacy in older individuals], Utrecht 2012. 2012; Available at: [https://www.nhg.org/sites/default/files/content/nhg\\_org/uploads/polyfarmacie\\_bij\\_ouderen.pdf](https://www.nhg.org/sites/default/files/content/nhg_org/uploads/polyfarmacie_bij_ouderen.pdf), 2015
12. Christensen M, Lundh A. Medication review in hospitalised patients to reduce morbidity and mortality. *Cochrane Database Syst Rev* 2016 Feb 20;2:CD008986
13. Holland R, Desborough J, Goodyer L, Hall S, Wright D, Loke YK. Does pharmacist-led medication review help to reduce hospital admissions and deaths in older people? A systematic review and meta-analysis. *Br J Clin Pharmacol* 2008 Mar;65(3):303-316



14. Wallerstedt SM, Kindblom JM, Nysten K, Samuelsson O, Strandell A. Medication reviews for nursing home residents to reduce mortality and hospitalization: systematic review and meta-analysis. *Br J Clin Pharmacol* 2014 Sep;78(3):488-497
15. Kwint HF, Bermingham L, Faber A, Gussekloo J, Bouvy ML. The relationship between the extent of collaboration of general practitioners and pharmacists and the implementation of recommendations arising from medication review: a systematic review. *Drugs Aging* 2013 Feb;30(2):91-102
16. Geurts MM, Talsma J, Brouwers JR, de Gier JJ. Medication review and reconciliation with cooperation between pharmacist and general practitioner and the benefit for the patient: a systematic review. *Br J Clin Pharmacol* 2012 Jul;74(1):16-33
17. Hatah E, Braund R, Tordoff J, Duffull SB. A systematic review and meta-analysis of pharmacist-led fee-for-services medication review. *Br J Clin Pharmacol* 2014 Jan;77(1):102-115
18. Jokanovic N, Tan EC, Sudhakaran S, Kirkpatrick CM, Dooley MJ, Ryan-Atwood TE, et al. Pharmacist-led medication review in community settings: An overview of systematic reviews. *Res Social Adm Pharm* 2016 Aug 28;pii:S1551-7411(16)30362-X
19. Hadi MA, Alldred DP, Briggs M, Munyombwe T, Closs SJ. Effectiveness of pharmacist-led medication review in chronic pain management: systematic review and meta-analysis. *Clin J Pain* 2014 Nov;30(11):1006-1014
20. WHOCC - ATC/DDD Index. Available at: [https://www.whocc.no/atc\\_ddd\\_index/](https://www.whocc.no/atc_ddd_index/). Accessed Oct, 2015
21. van der Meer HG, Wouters H, van Hulten R, Pras N, Taxis K. Decreasing the load? Is a Multidisciplinary Multistep Medication Review in older people an effective intervention to reduce a patient's Drug Burden Index? Protocol of a randomised controlled trial. *BMJ Open* 2015 Dec 23;5(12):e009213-2015-009213
22. Farmacotherapeutisch Kompas. [Dutch pharmacotherapeutic reference source]. Available at: <https://www.farmacotherapeutischkompas.nl/>. Accessed Aug, 2015
23. KNMP Kennisbank. [Dutch pharmacotherapeutic reference source]. Available at: <https://kennisbank.knmp.nl/>. Accessed Aug, 2015
24. Expertisecentrum farmacotherapie bij ouderen (EPHOR). [Dutch reference source for pharmacotherapy in older people]. Available at: <http://www.ephor.nl/pdf/Ephors-rapporten>. Accessed Aug, 2015
25. Lingjaerde O, Ahlfors UG, Bech P, Dencker SJ, Elgen K. The UKU side effect rating scale. A new comprehensive rating scale for psychotropic drugs and a cross-sectional study of side effects in neuroleptic-treated patients. *Acta Psychiatr Scand Suppl* 1987;334:1-100
26. de Vries ST, Haaijer-Ruskamp FM, de Zeeuw D, Denig P. Construct and concurrent validity of a patient-reported adverse drug event questionnaire: a cross-sectional study. *Health Qual Life Outcomes* 2014;12:103
27. Podsiadlo D, Richardson S. The timed "Up & Go": a test of basic functional mobility for frail elderly persons. *J Am Geriatr Soc* 1991 Feb;39(2):142-148

- 1  
2  
3 28. Solomon PR, Hirschhoff A, Kelly B, Relin M, Brush M, DeVeaux RD, et al. A 7 minute  
4 neurocognitive screening battery highly sensitive to Alzheimer's disease. *Arch Neurol* 1998  
5 Mar;55(3):349-355
- 6  
7 29. Reitan RM. The relation of the trail making test to organic brain damage. *J Consult Psychol* 1955  
8 Oct;19(5):393-394
- 9  
10 30. Wechsler D. Wechsler Adult Intelligence Scale. Third ed. San Antonio: The Psychological  
11 Corporation; 1997
- 12  
13 31. Kempen GI, Suurmeijer TP. The development of a hierarchical polychotomous ADL-IADL scale  
14 for noninstitutionalized elders. *Gerontologist* 1990 Aug;30(4):497-502
- 15  
16 32. Kempen GI, Miedema I, Ormel J, Molenaar W. The assessment of disability with the Groningen  
17 Activity Restriction Scale. Conceptual framework and psychometric properties. *Soc Sci Med* 1996  
18 Dec;43(11):1601-1610
- 19  
20 33. EuroQol EQ-5D-3L. Available at: [www.euroqol.org](http://www.euroqol.org). Accessed Aug, 2014
- 21  
22 34. Cohen J. A power primer. *Psychol Bull* 1992 Jul;112(1):155-159
- 23  
24 35. Guthrie B, Kavanagh K, Robertson C, Barnett K, Treweek S, Petrie D, et al. Data feedback and  
25 behavioural change intervention to improve primary care prescribing safety (EFIPPS): multicentre,  
26 three arm, cluster randomised controlled trial. *BMJ* 2016 Aug 18;354:i4079
- 27  
28 36. Gould RL, Coulson MC, Patel N, Highton-Williamson E, Howard RJ. Interventions for reducing  
29 benzodiazepine use in older people: meta-analysis of randomised controlled trials. *Br J Psychiatry*  
30 2014 Feb;204(2):98-107
- 31  
32 37. Tay HS, Soiza RL, Mangoni AA. Minimizing anticholinergic drug prescribing in older  
33 hospitalized patients: a full audit cycle. *Ther Adv Drug Saf* 2014 Jun;5(3):121-128
- 34  
35 38. Bpac nz. A practical guide to STOPPING MEDICINES in Older People. *BPJ* 2010;27(27):10-23
- 36  
37 39. Wouters H, van der Meer H, Taxis K. Quantification of anticholinergic and sedative drug load  
38 with the Drug Burden Index: a review of outcomes and methodological quality of studies. *Eur J Clin*  
39 *Pharmacol* 2017 Mar;73(3):257-266
- 40  
41 40. Wouters H, Scheper J, Koning H, Brouwer C, Twisk J, van der Meer H, et al. Discontinuing  
42 inappropriate medication in nursing home residents (DIM-NHR study): a cluster randomized  
43 controlled trial. *Ann Intern Med* . Forthcoming 2017
- 44  
45  
46  
47  
48  
49  
50  
51  
52  
53  
54  
55  
56  
57  
58  
59  
60

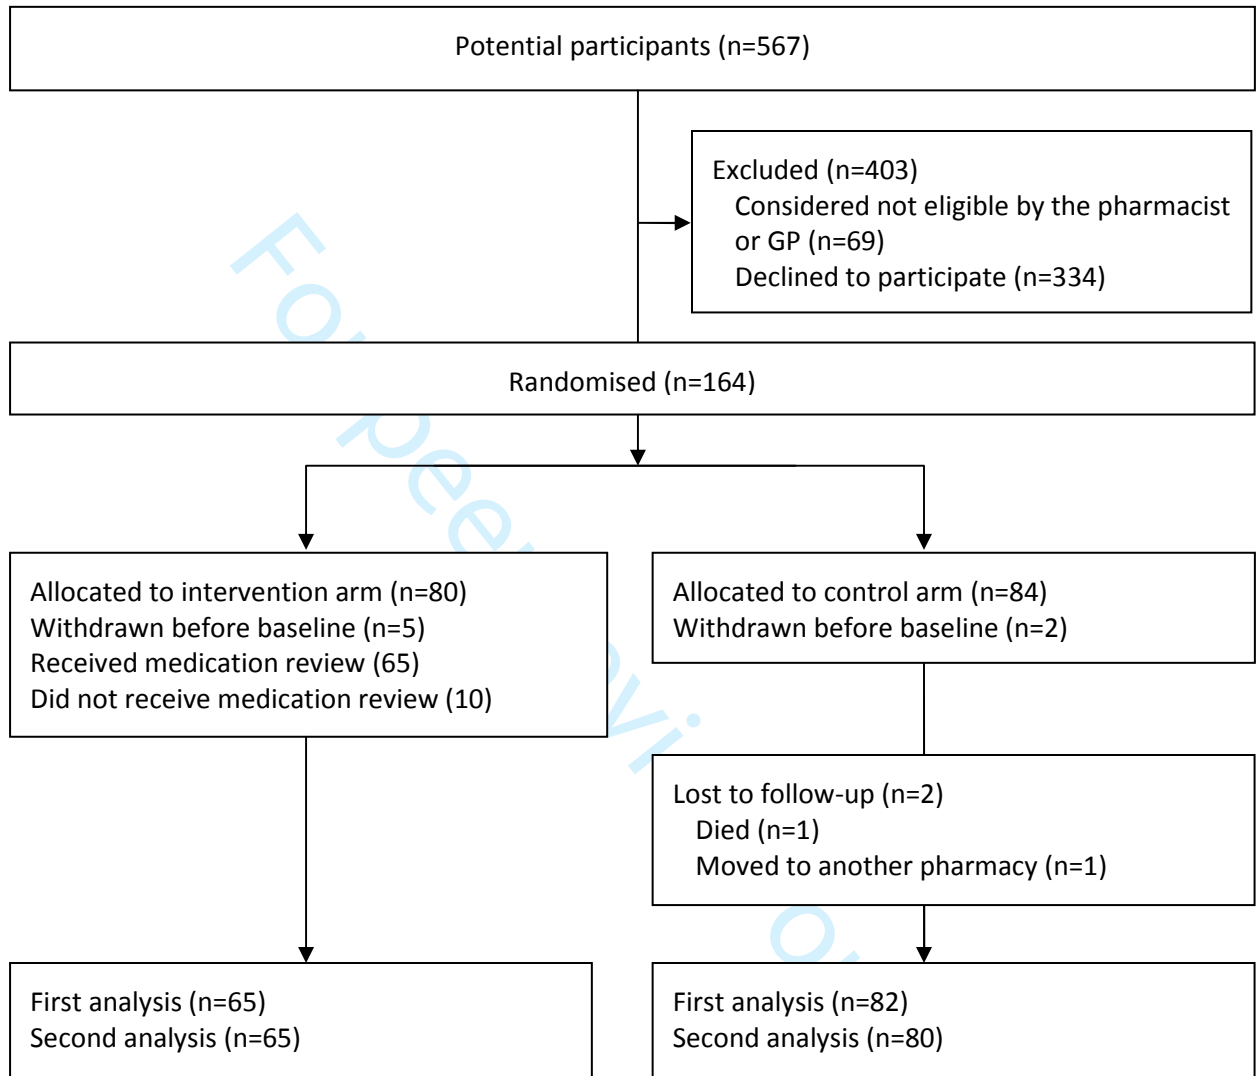

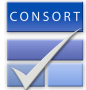

## CONSORT 2010 checklist of information to include when reporting a randomised trial\*

| Section/Topic                    | Item No | Checklist item                                                                                                                                                                              | Reported on page No |
|----------------------------------|---------|---------------------------------------------------------------------------------------------------------------------------------------------------------------------------------------------|---------------------|
| <b>Title and abstract</b>        |         |                                                                                                                                                                                             |                     |
|                                  | 1a      | Identification as a randomised trial in the title                                                                                                                                           | 1                   |
|                                  | 1b      | Structured summary of trial design, methods, results, and conclusions (for specific guidance see CONSORT for abstracts)                                                                     | 2-3                 |
| <b>Introduction</b>              |         |                                                                                                                                                                                             |                     |
| Background and objectives        | 2a      | Scientific background and explanation of rationale                                                                                                                                          | 4                   |
|                                  | 2b      | Specific objectives or hypotheses                                                                                                                                                           | 4                   |
| <b>Methods</b>                   |         |                                                                                                                                                                                             |                     |
| Trial design                     | 3a      | Description of trial design (such as parallel, factorial) including allocation ratio                                                                                                        | 4-5                 |
|                                  | 3b      | Important changes to methods after trial commencement (such as eligibility criteria), with reasons                                                                                          | N/A                 |
| Participants                     | 4a      | Eligibility criteria for participants                                                                                                                                                       | 4-5                 |
|                                  | 4b      | Settings and locations where the data were collected                                                                                                                                        | 6                   |
| Interventions                    | 5       | The interventions for each group with sufficient details to allow replication, including how and when they were actually administered                                                       | 5-6                 |
| Outcomes                         | 6a      | Completely defined pre-specified primary and secondary outcome measures, including how and when they were assessed                                                                          | 6                   |
|                                  | 6b      | Any changes to trial outcomes after the trial commenced, with reasons                                                                                                                       | N/A                 |
| Sample size                      | 7a      | How sample size was determined                                                                                                                                                              | 6-7                 |
|                                  | 7b      | When applicable, explanation of any interim analyses and stopping guidelines                                                                                                                | N/A                 |
| <b>Randomisation:</b>            |         |                                                                                                                                                                                             |                     |
| Sequence generation              | 8a      | Method used to generate the random allocation sequence                                                                                                                                      | 5                   |
|                                  | 8b      | Type of randomisation; details of any restriction (such as blocking and block size)                                                                                                         | 5                   |
| Allocation concealment mechanism | 9       | Mechanism used to implement the random allocation sequence (such as sequentially numbered containers), describing any steps taken to conceal the sequence until interventions were assigned | 5                   |
| Implementation                   | 10      | Who generated the random allocation sequence, who enrolled participants, and who assigned participants to interventions                                                                     | 5                   |
| Blinding                         | 11a     | If done, who was blinded after assignment to interventions (for example, participants, care providers, those                                                                                | 5                   |

|                                                      |     |                                                                                                                                                   |                |
|------------------------------------------------------|-----|---------------------------------------------------------------------------------------------------------------------------------------------------|----------------|
|                                                      |     | assessing outcomes) and how                                                                                                                       |                |
|                                                      | 11b | If relevant, description of the similarity of interventions                                                                                       | N/A            |
| Statistical methods                                  | 12a | Statistical methods used to compare groups for primary and secondary outcomes                                                                     | 7              |
|                                                      | 12b | Methods for additional analyses, such as subgroup analyses and adjusted analyses                                                                  | 7-8            |
| <b>Results</b>                                       |     |                                                                                                                                                   |                |
| Participant flow (a diagram is strongly recommended) | 13a | For each group, the numbers of participants who were randomly assigned, received intended treatment, and were analysed for the primary outcome    | 8-9            |
|                                                      | 13b | For each group, losses and exclusions after randomisation, together with reasons                                                                  | 7-8 + figure 1 |
| Recruitment                                          | 14a | Dates defining the periods of recruitment and follow-up                                                                                           | 4              |
|                                                      | 14b | Why the trial ended or was stopped                                                                                                                | N/A            |
| Baseline data                                        | 15  | A table showing baseline demographic and clinical characteristics for each group                                                                  | 8-9            |
| Numbers analysed                                     | 16  | For each group, number of participants (denominator) included in each analysis and whether the analysis was by original assigned groups           | 7-8 + figure 1 |
| Outcomes and estimation                              | 17a | For each primary and secondary outcome, results for each group, and the estimated effect size and its precision (such as 95% confidence interval) | 9-11           |
|                                                      | 17b | For binary outcomes, presentation of both absolute and relative effect sizes is recommended                                                       | 9-11           |
| Ancillary analyses                                   | 18  | Results of any other analyses performed, including subgroup analyses and adjusted analyses, distinguishing pre-specified from exploratory         | 9-11           |
| Harms                                                | 19  | All important harms or unintended effects in each group (for specific guidance see CONSORT for harms)                                             | N/A            |
| <b>Discussion</b>                                    |     |                                                                                                                                                   |                |
| Limitations                                          | 20  | Trial limitations, addressing sources of potential bias, imprecision, and, if relevant, multiplicity of analyses                                  | 11-12          |
| Generalisability                                     | 21  | Generalisability (external validity, applicability) of the trial findings                                                                         | 12             |
| Interpretation                                       | 22  | Interpretation consistent with results, balancing benefits and harms, and considering other relevant evidence                                     | 12             |
| <b>Other information</b>                             |     |                                                                                                                                                   |                |
| Registration                                         | 23  | Registration number and name of trial registry                                                                                                    | 3              |
| Protocol                                             | 24  | Where the full trial protocol can be accessed, if available                                                                                       | 5              |
| Funding                                              | 25  | Sources of funding and other support (such as supply of drugs), role of funders                                                                   | 13             |

\*We strongly recommend reading this statement in conjunction with the CONSORT 2010 Explanation and Elaboration for important clarifications on all the items. If relevant, we also recommend reading CONSORT extensions for cluster randomised trials, non-inferiority and equivalence trials, non-pharmacological treatments, herbal interventions, and pragmatic trials. Additional extensions are forthcoming: for those and for up to date references relevant to this checklist, see [www.consort-statement.org](http://www.consort-statement.org).

# BMJ Open

## Reducing the burden of anticholinergic and sedative medication in older patients on polypharmacy by pharmacist-led medication review: A randomized controlled trial

|                                 |                                                                                                                                                                                                                                |
|---------------------------------|--------------------------------------------------------------------------------------------------------------------------------------------------------------------------------------------------------------------------------|
| Journal:                        | <i>BMJ Open</i>                                                                                                                                                                                                                |
| Manuscript ID                   | bmjopen-2017-019042.R1                                                                                                                                                                                                         |
| Article Type:                   | Research                                                                                                                                                                                                                       |
| Date Submitted by the Author:   | 02-Jan-2018                                                                                                                                                                                                                    |
| Complete List of Authors:       | van der Meer, Helene; University of Groningen, Wouters, Hans; University of Groningen Pont, Lisa; University of Technology Sydney, Pharmacy Taxis, Katja; University of Groningen, Faculty of Mathematics and Natural Sciences |
| <b>Primary Subject Heading</b>: | Patient-centred medicine                                                                                                                                                                                                       |
| Secondary Subject Heading:      | Geriatric medicine                                                                                                                                                                                                             |
| Keywords:                       | AGED, DRUG BURDEN INDEX, MEDICATION REVIEW, MUSCARINIC ANTAGONISTS, POLYPHARMACY                                                                                                                                               |
|                                 |                                                                                                                                                                                                                                |

SCHOLARONE™  
Manuscripts

Only

1  
2  
3 **Reducing the burden of anticholinergic and sedative medication in older**  
4 **patients on polypharmacy by pharmacist-led medication review: A**  
5 **randomized controlled trial**  
6  
7  
8  
9  
10

- 11 1. Helene G van der Meer\*, MSc, Groningen Research Institute of Pharmacy, Unit of  
12 Pharmacotherapy, -Epidemiology & -Economics, University of Groningen, Antonius  
13 Deusinglaan 1, 9713 AV Groningen, The Netherlands. Email: h.g.van.der.meer@rug.nl  
14  
15 2. Hans Wouters, PhD, Groningen Research Institute of Pharmacy, Unit of Pharmacotherapy, -  
16 Epidemiology & -Economics, & Department of General Practice, University Medical Centre  
17 Groningen, University of Groningen, Groningen, The Netherlands.  
18  
19 3. Lisa G Pont, PhD, Discipline of Pharmacy, Graduate School of Health, University of Technology  
20 Sydney, Sydney, Australia.  
21  
22 4. Katja Taxis, PhD, Groningen Research Institute of Pharmacy, Unit of Pharmacotherapy, -  
23 Epidemiology & -Economics, University of Groningen, Groningen, The Netherlands.  
24  
25

26 \*Corresponding author.  
27  
28  
29  
30

31 **Keywords:** aged; drug burden index; medication review; muscarinic antagonists; polypharmacy  
32

33 **Word count:** 3452  
34

35 **Tables:** 3  
36

37 **Figure:** 1  
38

39 **Appendices:** 3  
40  
41  
42  
43  
44  
45  
46  
47  
48  
49  
50  
51  
52  
53  
54  
55  
56  
57  
58  
59  
60

## ABSTRACT

### OBJECTIVE

To evaluate if a pharmacist-led medication review is effective at reducing anticholinergic and sedative burden, as measured by the Drug Burden Index (DBI).

### DESIGN

Randomized controlled single blind trial.

### SETTING

15 community pharmacies in the Northern Netherlands.

### PARTICIPANTS

157 community-dwelling patients aged  $\geq 65$  years who used  $\geq 5$  medicines for  $\geq 3$  months, including at least one psycholeptic or psychoanaleptic medication, and who had a DBI  $\geq 1$ .

### INTERVENTION

A medication review by the community pharmacist in collaboration with the patient's general practitioner and patient.

### PRIMARY AND SECONDARY OUTCOMES MEASURES

The primary outcome was the proportion of patients whose DBI decreased by at least 0.5. Secondary outcomes were the presence of anticholinergic and/or sedative side effects, falls, cognitive function, activities of daily living, quality of life, hospital admission, and mortality. Data were collected at baseline and three-months follow-up.

### RESULTS

Mean participant age was 75.7 (SD, 6.9) years in the intervention arm and 76.6 (SD, 6.7) years in the control arm, and the majority were female (respectively 69.3% and 72.0%). Logistic regression analysis showed no difference in the proportion of patients with a  $\geq 0.5$  decrease in DBI between intervention arm (17.3%) and control arm (15.9%), (OR 1.04, CI 0.47 to 2.64,  $p=0.927$ ). Intervention patients scored higher on the digit symbol substitution test, measure of cognitive function, (OR 2.02, CI 1.11 to 3.67,  $p=0.021$ ), and reported fewer sedative side effects (OR 0.61, CI 0.40 to 0.94,  $p=0.024$ ) at follow-up.

### CONCLUSIONS



1  
2  
3 Pharmacist-led medication review as currently performed in the Netherlands was not effective in  
4 reducing the burden of anticholinergic/sedative medication measured with the DBI within the time  
5 frame of 3 months. Preventive strategies, signalling a rising burden and taking action before chronic  
6 use of anticholinergic and/or sedative medication is established, may be more successful.  
7  
8

### 9 **TRIAL REGISTRATION**

10  
11 Clinical trials NCT02317666.  
12  
13

### 14 **STRENGTHS AND LIMITATION OF THIS STUDY**

- 15  
16  
17  
18 • A successfully completed randomized controlled trial, which was the first to focus on  
19 changing anticholinergic and sedative medication load by medication review.  
20  
21
- 22 • Appropriately powered to detect a clinically relevant medium difference.  
23
- 24 • Showing the effect of “real world” practiced medication review, rather than the theoretical  
25 approach described in guidelines.  
26  
27
- 28 • Three-months follow-up might have been too short to detect full effects of medication review,  
29 e.g. due to stepwise reduction of medication, however very few dosage changes were seen.  
30  
31  
32  
33  
34  
35  
36  
37  
38  
39  
40  
41  
42  
43  
44  
45  
46  
47  
48  
49  
50  
51  
52  
53  
54  
55  
56  
57  
58  
59  
60

## BACKGROUND

Older people suffer from many medical conditions and use more medication than any other age group. Multiple medication use in combination with age-related physiological changes increase the risk of medication related harm including adverse drug events, drug-drug- and drug-disease-interactions.[1] Medications with anticholinergic and/or sedative properties are of particular concern in older people, because they worsen cognitive impairment and physical functioning, increase the risk of falls and negatively impact activities of daily living, hospitalization, and mortality.[2, 3] Despite the risks, these medications are commonly prescribed to older individuals.[4] Different measures have been developed to quantify the anticholinergic burden in patients.[5] The Drug Burden Index (DBI) determines an individual's exposure to anticholinergic and sedative medication taking into account the dose.[6, 7] A high DBI has been associated with impairments in both physical- and cognitive function among older individuals.[8] Hence, decreasing exposure to anticholinergic and sedative medication, as measured by the DBI, may have important health benefits in older people.

Two small Australian studies suggest that medication review could be a promising strategy in reducing the DBI.[9, 10] In most countries a medication review is a structured assessment of a patient's medication, performed by the community pharmacist and/or general practitioner (GP), in order to optimize prescribing.[11] While meta-analyses of studies in different settings show a lack of effectiveness on outcomes such as mortality or hospital (re-) admissions,[12-14] these studies included different types of medication review. Well-structured medication review with good cooperation between pharmacist and GP and involvement of the patient were most likely to be successful.[15, 16] Furthermore fee-for-pharmacist-led medication review seemed to have positive health benefits on the patient.[17] The most effective method for medication review remains unknown. Focusing on specific subgroups such as older people with multiple comorbidities and polypharmacy,[18] or patients suffering from pain [19] may be one strategy to optimize medication review associated benefits. To date, there is no consensus on the effectiveness of medication review as a strategy to reduce anticholinergic and sedative burden as measured by the DBI. Therefore, the primary aim of this study was to evaluate if a medication review is an effective strategy to reduce anticholinergic and sedative burden as measured by the DBI. Secondly, we evaluated the effect of a medication review on patient outcomes including cognitive function, risk of falls, activities of daily living and quality of life.

## METHODS

### Study design, setting & participants

We conducted a randomized controlled, single blind trial in 15 community pharmacies from December 2014 until October 2015 in the Northern Netherlands. Pharmacies were recruited via the regional

1  
2  
3 association of pharmacists and participation was voluntary. One pharmacist per pharmacy was  
4 involved in the study. In Dutch community pharmacy practice, all registered pharmacists are allowed  
5 to perform medication reviews. Furthermore, pharmacists collaborate with GPs in their area. This  
6 includes local regular meetings of pharmacists and GPs in pharmacotherapy counselling groups.[20]  
7 In the Netherlands, each individual is registered with a single pharmacy. Pharmacies hold a complete  
8 electronic medication history for each patient registered with them. When undertaking a medication  
9 review the pharmacists may request the patients' medical records from the GP. At the time of the  
10 study, all Dutch community pharmacists were required to perform medication reviews in cooperation  
11 with the GP for high risk patients according to the guidelines.[11]  
12  
13  
14  
15

16  
17 Patients who were aged  $\geq 65$  years, living independently, using  $\geq 5$  medications for  $\geq 3$  months,  
18 including at least one psycholeptic or psychoanaleptic medication (Anatomic Therapeutic  
19 Classification (ATC) code N05 or N06),[21] and with a DBI  $\geq 1$  were identified by the pharmacist and  
20 invited to participate in the study. Exclusion criteria were limited life expectancy ( $< 3$  months), non-  
21 Dutch language speaker or advanced dementia. Patients who had received a medication review within  
22 the past 9 months before the study period and patients who needed a medication review urgently were  
23 also excluded. Exclusion criteria were identified by the pharmacist with whom the patient was  
24 registered. This study was approved by the Medical Ethical Committee of the University Medical  
25 Centre of Groningen, The Netherlands (protocol number METc 2014/392). The study protocol has  
26 been published elsewhere.[22]  
27  
28  
29  
30  
31

### 32 **Randomization, allocation & blinding**

33  
34 Eligible patients were approached by the pharmacist and asked to provide written informed consent. In  
35 each pharmacy, patients willing to participate were then matched in pairs by gender, age, DBI and  
36 number of medications. One patient of each pair was randomly assigned to the intervention condition.  
37 All participants gave written consent prior to the intervention allocation. The randomization process  
38 was conducted by the principal investigator, who was not involved in recruitment or data collection.  
39 The researchers who enrolled the patients and collected the data were kept blind to the allocation.  
40 Pharmacists and patients could not be kept blind, but were explicitly asked not to reveal study  
41 allocation for individual patients to the researchers who collected the data. Therefore this was a single  
42 blind study.  
43  
44  
45  
46  
47

### 48 **Intervention**

49  
50 The intervention was a medication review conducted by the community pharmacist in close  
51 collaboration with the patients' GP and, if needed, other medical specialists. In the Netherlands  
52 medication review consists of five steps.[11] Step one is a face-to-face consultation between the  
53 pharmacist and patient to discuss medication use. Second, the pharmacist undertakes a  
54 pharmacotherapeutic medication review, identifying potential pharmacotherapeutic problems and  
55  
56  
57  
58  
59  
60

1  
2  
3 drafting written recommendations for medication optimisation to discuss with the patients' GP. Third,  
4 a multidisciplinary meeting, between pharmacist and GP is held. At this meeting, the potential  
5 medication problems of the patient are discussed and draft of a pharmacotherapeutic action plan is  
6 decided. Fourth, a discussion of the draft pharmacotherapeutic action plan between patient and  
7 pharmacist and/or GP. The patients' expectations and wishes are key elements in the decision-making  
8 process and are included in the final action plan. Fifth, a follow-up of the final pharmacotherapeutic  
9 action plan is undertaken. Further detail of the medication review process and the Dutch guideline  
10 underpinning the study can be found in our previously published study protocol.[22] The pharmacists  
11 participating in the study all undertook regular medication reviews as part of their practice and as such  
12 were familiar with the guideline. Nonetheless, we provided the guidelines to the pharmacists with the  
13 request to focus on anticholinergic and sedative medications. No additional educational material on  
14 anticholinergic and sedative medication was provided. In order to get a reflection of 'real world'  
15 practice, we let the pharmacists perform the medication reviews according to their routine practice, but  
16 we did check whether all 5 steps were conducted. The medication review took place within days after  
17 the baseline measurement for the intervention patients. In the control group, patients received the  
18 medication review after the study period.

### 27 **Outcomes**

28 The primary outcome was defined as the difference in proportion of patients having a decrease of DBI  
29  $\geq 0.5$  at 3-months follow-up. We chose a 3-months follow-up because this was a reasonable time  
30 frame to detect medication changes by the medication review. A longer follow-up would have  
31 increased the chance of medication changes due to other reasons, such as changes in disease status.  
32 Our hypothesis was that the proportion with a 0.5 decrease in DBI would be higher in the intervention  
33 arm compared to the control arm. We chose 0.5, as this equals the cessation of one drug, which we  
34 considered a clinically relevant decrease. The DBI was calculated using the following formula [7]:  
35

$$36 \text{ DBI} = \sum \frac{D}{D + \delta}$$

37  
38 D = daily dose,  $\delta$  = minimum recommended daily dose were derived for the study from Dutch  
39 standard reference sources.[23, 24] Except for sensory and dermatological preparations, all chronic  
40 medications (i.e. those used for  $\geq 3$  months) with anticholinergic properties (dry mouth, constipation  
41 and urine retention) and sedative properties based on Dutch standard reference sources [23-25] were  
42 included in the calculation. Medication data were derived from electronic pharmacy dispensing data  
43 and were verified with the patient.  
44

45 We included the following secondary outcomes: anticholinergic side effects, measured by the Udvalg  
46 for Kliniske Undersogelser (UKU) side effect rating scale,[26] sedative side effects, derived from a  
47 patient-reported adverse drug event questionnaire,[27] and risk of falls, determined by the Up & Go  
48  
49  
50  
51

1  
2  
3 test.[28] Cognitive function was measured using validated tests for memory and executive function,  
4 namely the Seven Minute Screen (7MS),[29] the Trailmaking Test A & B,[30] and Digit Symbol  
5 Substitution Test (DSST).[31] The latter has also previously been used to examine the validity of the  
6 DBI.[7] Activities of daily living were derived using the validated Groningen Activity Restriction  
7 Scale (GARS),[32, 33] and quality of life was measured by the Euroqol-5 Dimension-3 Level (EQ-  
8 5D-3L) questionnaire, including visual analogue scale (VAS).[34] All tools were administered in  
9 Dutch and data were collected in a standardized manner, using data collection sheets, by researchers  
10 who were trained by a psychologist. Data collection took place at baseline and 3-months follow-up for  
11 both allocations. Patients with the inability to walk were excluded from the Up&Go test and the  
12 GARS questionnaire. At follow-up the number of fall incidents, hospital admission, and mortality was  
13 assessed based on patient/relative reporting.  
14  
15  
16  
17  
18

### 19 **Sample size calculation**

20  
21 To the best of our knowledge, only one randomized pilot study has been conducted assessing the  
22 DBI.[10] We therefore could not calculate the sample size 'a priori'. However we estimated a sample  
23 size based on a power of 80% at a significance of 0.05 and an intra-class correlation coefficient up to  
24 0.2 to detect a medium effect size on the primary outcome.[35] We chose a medium effect size as we  
25 considered a small effect size to be not clinically relevant and a power to detect a medium effect size  
26 also to be capable of detecting a large effect size. For this calculation around 160 participants (80 in  
27 control arm and 80 in intervention arm) were needed. We expected a non-response rate of 60% and  
28 therefore aimed to invite 400 patients to participate in the study.  
29  
30  
31  
32  
33

### 34 **Statistical analysis**

35 We performed two analyses. In the first analysis we included all patients with a baseline measurement.  
36 In the second analysis, we included all patients who were not lost to follow-up, and who received the  
37 intervention as allocated. Descriptive statistics were calculated for both allocation arms at baseline.  
38 For the analysis of the primary outcome, we initially considered a generalized linear mixed effects  
39 model to adjust for dependence of observations (i.e. clustering of patients within pharmacies).  
40 However, as the intra-class correlation was not significant and no significant clustering was observed,  
41 extension of the model with random effects at the level of pharmacies was not necessary. Therefore,  
42 only fixed effects were considered and standard fixed effects logistic regression model applied. Most  
43 secondary outcomes were examined with standard regression models. Variables with a skewed  
44 distribution were transformed before analysis. For dichotomous variables we reported percentages and  
45 numbers of patients in the best scoring group, for skewed variables we report the median and  
46 interquartile range and for normally distributed data we report the mean and standard deviation.  
47 Further detail on the analysis of secondary outcome tests and –questionnaires data can be found in  
48 appendix table 1. Reported falls, hospitalization and mortality were only assessed from patients with a  
49 follow-up measurement. These variables were dichotomized, reported as number and percentages of  
50  
51  
52  
53  
54  
55  
56  
57  
58  
59  
60

1  
2  
3 patients and analysed using Fisher's exact test. A sensitivity analysis was conducted on outliers  
4 (appendix table 2) and all analyses were adjusted for gender, age, and number of medication at  
5 baseline. Secondary outcomes were also adjusted for baseline scores. Analyses were done in SPSS 24  
6 and MLwiN 2.36, statistical tests were two-sided and conducted at the 5% significance level.  
7  
8

### 9 **Missing data**

10 Few data were missing for the primary outcome. Of the two patients, who were lost to follow-up, the  
11 baseline observation for medication use was carried forward to follow-up. For eight patients,  
12 medication use could not be verified with the patient, as they could not be reached by telephone  
13 despite several attempts. For these patients, the medication data from the pharmacy dispensing system  
14 were used. For secondary outcomes, 5.3% of data were missing in the complete dataset, mostly at  
15 follow-up (4.8%). In the intervention arm, 7.0% of data was missing (6.1% at follow-up) across 18  
16 patients, whereas in the control arm 3.7% was missing (3.4% at follow-up) across 12 patients. In total  
17 30 patients had missing data, of whom two were lost to follow-up. Eight patients were not able to  
18 complete one or more cognitive tests (0.5% of all data). Eleven patients could not be tested at follow-  
19 up within the study period, six patients due to sickness, four patients due to practical reasons (despite  
20 numerous attempts we were unsuccessful to arrange an appointment for the follow-up measurement),  
21 and one patient had died two days before the follow-up appointment. A few data were missing for  
22 other reasons across nine patients, for example patients forgetting their glasses, due to time  
23 constraints, or other reasons.  
24  
25

26 Missing data in cognitive tests due to inability of the patient to complete the task were replaced with  
27 the worst score for that specific group. Missing data of patients who could not be tested at follow-up  
28 within the study period, or who had missing data for other reasons were replaced by multiple  
29 imputation (five times) in SPSS 24. In this paper we report on the imputed dataset. Sensitivity analysis  
30 showed no difference between the dataset with and without missing data.  
31  
32  
33  
34  
35  
36  
37  
38  
39  
40  
41

## 42 **RESULTS**

### 43 **Participant flow**

44 Overall, 498 patients were approached for participation, 164 patients provided informed consent  
45 (32.9% response rate), and 157 patients completed at least the baseline measurement and were  
46 included in the first analysis (Figure 1). The drop-out rate was 4.3%.  
47  
48  
49  
50

### 51 **Participant characteristics**

52 The average participant age was 75.7 (SD, 6.9) years in the intervention arm and 76.6 (SD, 6.7) years  
53 in the control arm, and the majority were female (respectively 69.3% and 72.0%). Participants in the  
54  
55  
56  
57  
58  
59  
60

control arm used slightly more medicines at baseline (9.3 (SD, 3.2) to 8.4 (SD,2.4)), and more control patients were living with a partner (53.6% to 44%) (Table 1).

Table 1 Demographic characteristics at baseline.

|                                                   | Intervention (n=75) | Control (n=82) |
|---------------------------------------------------|---------------------|----------------|
| <b>Age (years) mean (SD)</b>                      | 75.7 (6.9)          | 76.6 (6.7)     |
| <b>Sex (female) (n (%))</b>                       | 52 (69.3)           | 59 (72.0)      |
| <b>Number of medicines (mean (SD))</b>            | 8.4 (2.4)           | 9.3 (3.2)      |
| <b>DBI (mean (SD))</b>                            | 3.1 (1.0)           | 3.2 (1.0)      |
| <b>Marital status (n (%))</b>                     |                     |                |
| <b>Partner</b>                                    | 33 (44.0)           | 44 (53.6)      |
| <b>Widow/widower/Divorced/single</b>              | 34 (45.3)           | 32 (39.0)      |
| <b>Unknown</b>                                    | 8 (10.6)            | 6 (7.3)        |
| <b>Level of education (n (%))</b>                 |                     |                |
| <b>No/ low/ middle</b>                            | 58 (77.3)           | 64 (78.0)      |
| <b>High</b>                                       | 9 (12.0)            | 13 (15.8)      |
| <b>Unknown</b>                                    | 8 (10.6)            | 5 (6.0)        |
| <b>Medication use at baseline (top 5 (n (%)))</b> |                     |                |
| <b>ATC Nervous system</b>                         | 75 (100)            | 82 (100)       |
| <b>ATC Cardiovascular</b>                         | 70 (93.3)           | 74 (90.2)      |
| <b>ATC Alimentary tract</b>                       | 64 (85.3)           | 71 (86.6)      |
| <b>ATC Blood/ blood forming organs</b>            | 49 (65.3)           | 46 (56.1)      |
| <b>ATC Respiratory tract</b>                      | 20 (26.7)           | 38 (46.3)      |

### Primary outcome

In the first analysis, which included all patients with a baseline measurement, the proportion of patients with a decrease of  $DBI \geq 0.5$  did not differ between patients in intervention- and control group (17.3% to 15.9%, OR 1.04, CI 0.47 to 2.64,  $p=0.927$ ). Similar results were obtained in the second analysis, which included all patients who were not lost to follow-up, and who received the intervention as allocated (Table 2). A detailed description of medications started, stopped and changed in dose in both arms can be found in appendix table 3.

Table 2: Proportion of patients having a decrease in  $DBI \geq 0.5$  by analysis type

| Analysis type | Proportion with decrease of<br>DBI $\geq 0.5$ (% , n) | Odds ratio (95% CI) * | p-value |
|---------------|-------------------------------------------------------|-----------------------|---------|
|---------------|-------------------------------------------------------|-----------------------|---------|

|                         | Intervention | Control   |                     |       |
|-------------------------|--------------|-----------|---------------------|-------|
| First analysis (n=157)  | 17.3 (13)    | 15.9 (13) | 1.04 (0.47 to 2.64) | 0.927 |
| Second analysis (n=145) | 18.5 (12)    | 16.3 (13) | 1.09 (0.45 to 2.63) | 0.857 |

\* Binary logistic regression, adjusted for age, gender, number of medication at baseline.

First analysis: all patients with a baseline measurement

Second analysis: all patients who were not lost to follow-up, and who received the intervention as allocated

### Secondary outcome

Secondary outcome tests and - questionnaires were analysed including all patients who were not lost to follow-up and who received the intervention as allocated (Table 3). A difference was seen in the DSST and reporting of sedative side effects between allocation arms. Patients in the intervention arm scored higher at follow-up on average (3 (SD, 1) to 1 (SD, 0) point (s), OR 2.02, CI 1.11 to 3.67, p=0.021) and reported less sedative side effects at follow up compared to the control arm (-1 (IQR, -2) to 1 (IQR, 0) point(s), OR 0.61, CI 0.40 to 0.94, p=0.024). For all other secondary outcomes no difference was found between intervention and control arm.

Table 3: Secondary outcome tests and - questionnaires at follow-up

| Outcome                                                     | Intervention (n=65) |             | Control (n=80) |            | Treatment difference at FU (95% CI) |
|-------------------------------------------------------------|---------------------|-------------|----------------|------------|-------------------------------------|
|                                                             | BL score            | Δ with FU   | BL score       | Δ with FU  |                                     |
| <b>Trailmaking Test A</b> , median (IQR)                    | 59.0 (36.9)         | -8.4 (-4.8) | 61.0 (27.8)    | -6.0 (1.6) | -0.01 (-0.11 - 0.09) <sup>†</sup>   |
| <b>Trailmaking Test B</b> , median (IQR)                    | 149.0 (103.0)       | -3.9 (24.1) | 152.0 (103.0)  | 1.0 (19.0) | -0.01 (-0.14 - 0.11) <sup>†</sup>   |
| <b>DSST</b> , mean (SD)                                     | 36.4 (12.2)         | 2.6 (1.2)   | 36.4 (13.2)    | 1.0 (-0.3) | 0.70 (0.11 - 1.30) <sup>†*</sup>    |
| <b>7MS enhanced cued recall</b> , % (n) best scoring        | 85 (55)             | 0 (0)       | 84 (71)        | 5 (4)      | 0.54 (0.15 - 1.90) <sup>‡</sup>     |
| <b>7MS Benton temporal orientation</b> , % (n) best scoring | 95 (62)             | -3 (-2)     | 99 (79)        | -4 (-3)    | 1.38 (0.28 - 6.88) <sup>‡</sup>     |
| <b>7MS clock drawing</b> , % (n) best scoring               | 80 (52)             | -8 (-5)     | 86 (69)        | -6 (-5)    | 0.67 (0.28 - 1.62) <sup>‡</sup>     |
| <b>7MS category fluency</b> , mean (SD)                     | 16.1 (5.5)          | 0.1 (-0.6)  | 15.9 (5.0)     | 0.4 (-0.3) | -0.18 (-1.55 - 1.20) <sup>†</sup>   |



|                                            |             |             |             |             |                                   |
|--------------------------------------------|-------------|-------------|-------------|-------------|-----------------------------------|
| <b>GARS, % (n) best scoring</b>            | 72 (46)     | 2 (-1)      | 69 (54)     | 0 (0)       | 1.73 (0.62 - 4.84) <sup>‡0</sup>  |
| <b>Sedative side effects, median (IQR)</b> | 3.0 (5.0)   | -1.0 (-2.0) | 2.0 (4.0)   | 1 (0)       | 0.61 (0.40 - 0.94) <sup>§*</sup>  |
| <b>UKU, median (IQR)</b>                   | 17.0 (22.0) | -3.0 (1.0)  | 18.0 (27.0) | -1.6 (-2.4) | 0.97 (0.67 - 1.39) <sup>§</sup>   |
| <b>EQ-5D-3L, % (n) best scoring</b>        | 74 (48)     | 9 (6)       | 76 (61)     | 4 (3)       | 1.43 (0.51 - 4.03) <sup>‡</sup>   |
| <b>VAS, mean (SD)</b>                      | 6.6 (1.6)   | -0.2 (0.0)  | 6.8 (1.4)   | -0.1 (0.1)  | -0.09 (-0.50 - 0.32) <sup>†</sup> |
| <b>Up&amp;Go, % (n) best scoring</b>       | 66 (42)     | 0 (0)       | 64 (50)     | 4 (3)       | 1.37 (0.60 - 3.14) <sup>‡0</sup>  |

BL = Baseline, FU = Follow-up, DSST = Digit Symbol Substitution Test; 7MS = Seven Minute Screen; GARS = Groningen Activities Restriction Scale; UKU = Udvalg for Kliniske Undersogelser (measuring anticholinergic side effects); VAS = visual analogue scale (part of EQ-5D-3L).

<sup>†</sup>Linear regression analysis (reporting unstandardized b), <sup>‡</sup>logistic regression analysis (reporting odds ratio), <sup>§</sup>negative binomial regression analysis (reporting incident rate ratio) used, all adjusted for age, gender, number of medication at baseline. \*Statistically significant difference ( $p < 0.05$ ). <sup>0</sup>Deviation of number of patients: n=64 for intervention, n=78 for control, 3 patients were excluded from this test/questionnaire.

Reported falls and hospitalization could be assessed from 136 patients who were included in the second analysis. No significant difference was found in reported falls between control- and intervention group, respectively 15 patients (19.5%) versus 18 patients (30.5%), ( $p=0.100$ ). There was also no difference found between control- and intervention arm in hospitalization, 9 (11.7%) versus 3 (5.1%) patients reported unplanned hospital admission, ( $p=0.149$ ). Of all patients who were included in the study, 2 died, 1 (1.2%) in control group to 1 (1.3%) intervention group, ( $p=0.732$ ).

## DISCUSSION

In our study pharmacist-led medication review did not reduce the anticholinergic and/or sedative medication load in older people within the first 3-months following review. In addition, medication review did not improve cognitive function, apart from the DSST. We also found that medication review had no effect on anticholinergic side effects, quality of life, activities of daily living, risk of falls, hospitalization, and mortality. However, intervention patients reported fewer sedative side effects.

### Strengths and limitations of the study

This randomized controlled trial was the first to focus on changing anticholinergic and sedative medication load by medication review. The trial was completed successfully, allocation arms were comparable and we achieved a medium response rate. We also believe our study was appropriately

1  
2  
3 powered to detect a clinically relevant medium difference between intervention and control arm. Yet  
4 there are some methodological limitations that should be considered when interpreting our findings.  
5 Firstly, our study design might have introduced a risk of contamination between intervention- and  
6 control arm, as pharmacists and GPs could have been triggered to optimize medication use also for  
7 patients in the control arm during the study period. We know from the pharmacists that no structured  
8 medication reviews were performed for control patients during the study period. Therefore we believe  
9 that changes we observed in control patients were due to usual care. Cluster randomization may have  
10 prevented the chance of contamination, but this method has other disadvantages.[36] Second, although  
11 we did check whether all steps of the medication review were conducted, it was outside the scope of  
12 our study to investigate to what extent pharmacists adhered to communication methods recommended  
13 by the guideline on performing the medication review. Informal conversations with pharmacists  
14 suggested that although the guidelines recommend a face-to-face meeting between the pharmacist and  
15 GP, some pharmacists contacted the GP by phone, fax, or email due to lack of time. This might have  
16 had an effect on the implementation of medication suggestions.[16] A full process evaluation might  
17 have given insight in this, but also might have changed the normal practice of pharmacists to carry out  
18 medication reviews.[37] We believe that our results reflect “real-world” practice of how medication  
19 reviews were carried out in Dutch health care practice at the time of the study. Third, we followed  
20 patients for three months after the intervention. One could suggest that more time was needed to  
21 determine the effect of the intervention, as changes in medication use may require more time, for  
22 example withdrawing of medication by step-wise reduction of dosing. However, there did not seem to  
23 be a difference in dosage changes between intervention- and control arm. Finally, one third of all  
24 eligible patients were willing to participate in the study. Given the frailty of this population and the  
25 time consuming nature of participation, we think this is a very reasonable response rate. Nevertheless,  
26 our results may not be generalizable to the total population.  
27  
28  
29  
30  
31  
32  
33  
34  
35  
36  
37  
38

### 39 **Comparison with other studies**

40 The medication changes in both groups were comparable, suggesting that these reflect fluctuations of  
41 medication use over time as prescribing is a dynamic - rather than a static process. We do not know  
42 the pattern of fluctuations in anticholinergic and sedative medication prescribing; this should be  
43 explored in longitudinal studies. Our results are in line with a number of meta-analyses, which also  
44 reported a lack of effect of medication reviews on a variety of patient outcomes.[12-14] Our results are  
45 in contrast to a number of studies, which found medication reviews to be effective in specific  
46 subgroups of patients with multiple comorbidities, polypharmacy and pain.[18, 19] The medication  
47 reviews in these studies however were not specifically focusing on medication with anticholinergic  
48 and/or sedative properties as we did. Two small Australian studies suggest that the DBI can be  
49 lowered, but these studies were based on pharmacist recommendations and did not investigate actual  
50 implementation of these by the GP.[9, 10] Although some lowering of the DBI was seen, the latter  
51  
52  
53  
54  
55  
56  
57  
58  
59  
60

1  
2  
3 study did find that GPs had difficulties in changing medications, for example with those medications  
4 initiated by specialists. A recent study also showed that while it was possible to optimize use for a  
5 number of medication classes, psychotropic medications were among the most difficult to adjust.[38]  
6 So, despite guidance how to reduce anticholinergic and sedative medication,[39-41] as highlighted by  
7 our findings, there seem to be important barriers preventing reduction in clinical practice.  
8  
9

### 10 **Conclusions and implications for practice**

11 Using the DBI, a highly vulnerable population group in need of medication optimization can be  
12 identified. Pharmacist-led medication review as currently performed in the Netherlands did not appear  
13 effective in reducing the DBI. Despite some practical issues with the DBI, such as the lack of an  
14 international consensus-based list of anticholinergic/sedative medication including minimum  
15 doses,[42] we suggest to use the DBI as a tool to identify harmful medication users. This approach  
16 may be suitable for other patient groups and in other settings such as nursing homes or GP practice  
17 with co-located pharmacist.[43, 44] Enlarging the multidisciplinary team should also be considered,  
18 for example psychiatrists advising GPs on lowering or ceasing medication and psychologists assisting  
19 patients during withdrawal. Furthermore, signalling a rising burden and taking action before chronic  
20 use of medication with anticholinergic and/or sedative properties is established may be the preferred  
21 approach.  
22  
23  
24  
25  
26  
27  
28  
29  
30  
31  
32  
33  
34  
35  
36  
37  
38  
39  
40  
41  
42  
43  
44  
45  
46  
47  
48  
49  
50  
51  
52  
53  
54  
55  
56  
57  
58  
59  
60

## ACKNOWLEDGEMENTS

We thank Marjolein Deurloo, Laura Hellemans and Floor Hulshof for helping with the data collection.

### Funding

This study was supported by the Dutch Pharmacy Society “Koninklijke Nederlandse Maatschappij ter bevordering der Pharmacie” (KNMP), grant number 14b.27. The funder had no involvement in the study design; in the collection, analysis and interpretation of the data; in the writing of the report; and in the decision to submit the paper for publication.

### Competing interests

All authors have completed the ICMJE uniform disclosure form at [www.icmje.org/coi\\_disclosure.pdf](http://www.icmje.org/coi_disclosure.pdf) and declare: no support from any organisation for the submitted work; no financial relationships with any organisations that might have an interest in the submitted work in the previous three years; no other relationships or activities that could appear to have influenced the submitted work.

### Contributors

KT initiated the study and HW and HGvdM contributed to the study conception, design, and to the intervention development. HGvdM, HW and KT reviewed the study parameters and contributed to the analysis plan; obtained ethical approval. KT did randomisation. HGvdM led the trial and collected the data. HGvdM and HW did the statistical analysis with input from KT. All authors contributed to the interpretation of the results. HGvdM drafted the manuscript. All the authors revised and approved the final manuscript. KT is the guarantor.

### Data sharing

Data are available from corresponding author on request.

### Ethics approval

This study was approved by the Medical Ethical Committee of the University Medical Centre of Groningen (protocol number METc 2014/392; in Dutch: Medisch Ethische Toetsingscommissie van het Universitair Medisch Centrum Groningen [METc UMCG]). Participants provided written informed consent before participating in the study.

## REFERENCES

- 1 Taxis K, O'Sullivan D, Cullinan S, et al. Drug utilization in older people. In: Elseviers M, Wettermark B, Almarsdóttir A, et al., eds. Drug utilization research: Methods and applications. London: Wiley-Blackwell 2016:259-69.
- 2 Fox C, Smith T, Maidment I, et al. Effect of medications with anti-cholinergic properties on cognitive function, delirium, physical function and mortality: a systematic review. *Age Ageing*2014;43:604-15 doi:10.1093/ageing/afu096 [published Online First: 19 July 2014].
- 3 Park H, Satoh H, Miki A, et al. Medications associated with falls in older people: systematic review of publications from a recent 5-year period. *Eur J Clin Pharmacol*2015;71:1429-40 doi:10.1007/s00228-015-1955-3 [published Online First: 26 September 2015].
- 4 Bell JS, Mezrani C, Blacker N, et al. Anticholinergic and sedative medicines - prescribing considerations for people with dementia. *Aust Fam Physician*2012;41:45-9.
- 5 Pont LG, Nielen JT, McLachlan AJ, et al. Measuring anticholinergic drug exposure in older community-dwelling Australian men: a comparison of four different measures. *Br J Clin Pharmacol*2015;80:1169-75 doi:10.1111/bcp.12670 [published Online First: 6 July 2015].
- 6 Cardwell K, Hughes CM, Ryan C. The Association Between Anticholinergic Medication Burden and Health Related Outcomes in the 'Oldest Old': A Systematic Review of the Literature. *Drugs Aging*2015;32:835-48 doi:10.1007/s40266-015-0310-9 [published Online First: 6 October 2015].
- 7 Hilmer SN, Mager DE, Simonsick EM, et al. A drug burden index to define the functional burden of medications in older people. *Arch Intern Med*2007;167:781-7 doi:10.1001/archinte.167.8.781 [published Online First: 23 April 2007].
- 8 Ruxton K, Woodman RJ, Mangoni AA. Drugs with anticholinergic effects and cognitive impairment, falls and all-cause mortality in older adults: A systematic review and meta-analysis. *Br J Clin Pharmacol*2015;80:209-20 doi:10.1016/j.sapharm.2015.11.002 [published Online First: 11 November 2015].
- 9 Castelino RL, Hilmer SN, Bajorek BV, et al. Drug Burden Index and potentially inappropriate medications in community-dwelling older people: the impact of Home Medicines Review. *Drugs Aging*2010;27:135-48 doi:10.2165/11531560-000000000-00000 [published Online First: 21 September 2012].
- 10 Gnjidic D, Le Couteur DG, Abernethy DR, et al. A pilot randomized clinical trial utilizing the drug burden index to reduce exposure to anticholinergic and sedative medications in older people. *Ann Pharmacother*2010;44:1725-32 doi:10.1345/aph.1P310 [published Online First: 28 September 2010].
- 11 Nederlands Huisartsen Genootschap (NHG) [Multidisciplinary guideline on polypharmacy in older individuals], Utrecht 2012. Available at: [https://www.nhg.org/sites/default/files/content/nhg\\_org/uploads/polyfarmacie\\_bij\\_ouderen.pdf](https://www.nhg.org/sites/default/files/content/nhg_org/uploads/polyfarmacie_bij_ouderen.pdf). Accessed August, 2015.

1  
2  
3 12 Christensen M, Lundh A. Medication review in hospitalised patients to reduce morbidity and  
4 mortality. *Cochrane Database Syst Rev*2016;2:CD008986 doi:10.1002/14651858.CD008986.pub3  
5 [published Online First: 20 February 2016].  
6

7 13 Holland R, Desborough J, Goodyer L, et al. Does pharmacist-led medication review help to reduce  
8 hospital admissions and deaths in older people? A systematic review and meta-analysis. *Br J Clin  
9 Pharmacol*2008;65:303-16 doi:10.1111/j.1365-2125.2007.03071.x [published Online First: 18  
10 December 2007].  
11

12 14 Wallerstedt SM, Kindblom JM, Nylen K, et al. Medication reviews for nursing home residents to  
13 reduce mortality and hospitalization: systematic review and meta-analysis. *Br J Clin  
14 Pharmacol*2014;78:488-97 doi:10.1111/bcp.12351 [published Online First: 21 August 2014].  
15

16 15 Kwint HF, Bermingham L, Faber A, et al. The relationship between the extent of collaboration of  
17 general practitioners and pharmacists and the implementation of recommendations arising from  
18 medication review: a systematic review. *Drugs Aging*2013;30:91-102 doi:10.1007/s40266-012-0048-6  
19 [published Online First: 16 January 2013].  
20

21 16 Geurts MM, Talsma J, Brouwers JR, et al. Medication review and reconciliation with cooperation  
22 between pharmacist and general practitioner and the benefit for the patient: a systematic review. *Br  
23 J Clin Pharmacol*2012;74:16-33 doi:10.1111/j.1365-2125.2012.04178.x [published Online First: 11  
24 June 2012].  
25

26 17 Hatah E, Braund R, Tordoff J, et al. A systematic review and meta-analysis of pharmacist-led fee-  
27 for-services medication review. *Br J Clin Pharmacol*2014;77:102-15 doi:10.1111/bcp.12140  
28 [published Online First: 18 April 2013].  
29

30 18 Jokanovic N, Tan EC, Sudhakaran S, et al. Pharmacist-led medication review in community  
31 settings: An overview of systematic reviews. *Res Social Adm Pharm*2016;13:661-85  
32 doi:10.1016/j.sapharm.2016.08.005 [published Online First: 20160828].  
33

34 19 Hadi MA, Alldred DP, Briggs M, et al. Effectiveness of pharmacist-led medication review in chronic  
35 pain management: systematic review and meta-analysis. *Clin J Pain*2014;30:1006-14  
36 doi:10.1097/AJP.000000000000063 [published Online First: 1 November 2012].  
37

38 20 Teichert M, Schoenmakers T, Kylstra N, et al. Quality indicators for pharmaceutical care: a  
39 comprehensive set with national scores for Dutch community pharmacies. *Int J Clin  
40 Pharm*2016;38:870-9 doi:10.1007/s11096-016-0301-x [published Online First: 23 April 2016].  
41

42 21 ATC/DDD Index. Available at: [https://www.whocc.no/atc\\_ddd\\_index/](https://www.whocc.no/atc_ddd_index/). Accessed March, 2017.  
43

44 22 van der Meer HG, Wouters H, van Hulten R, et al. Decreasing the load? Is a Multidisciplinary  
45 Multistep Medication Review in older people an effective intervention to reduce a patient's Drug  
46 Burden Index? Protocol of a randomised controlled trial. *BMJ Open*2015;5:e009213  
47 doi:10.1136/bmjopen-2015-009213.  
48

49 23 Farmacotherapeutisch Kompas. [Dutch pharmacotherapeutic reference source]. Available at:  
50 <https://www.farmacotherapeutischkompas.nl/>. Accessed Aug, 2015.  
51

52 24 KNMP Kennisbank. [Dutch pharmacotherapeutic reference source]. Available at:  
53 <https://kennisbank.knmp.nl/>. Accessed Aug, 2015.  
54

1  
2  
3 25 Expertisecentrum farmacotherapie bij ouderen (EPHOR). [Dutch reference source for  
4 pharmacotherapy in older people]. Available at: <http://www.ephor.nl/pdf/Ephors-rapporten>.  
5 Accessed Aug, 2015.

6  
7 26 Lingjaerde O, Ahlfors UG, Bech P, et al. The UKU side effect rating scale. A new comprehensive  
8 rating scale for psychotropic drugs and a cross-sectional study of side effects in neuroleptic-treated  
9 patients. *Acta Psychiatr Scand Suppl*1987;334:1-100 doi:10.1111/j.1600-0447.1987.tb10566.x.

10  
11 27 de Vries ST, Haaijer-Ruskamp FM, de Zeeuw D, et al. Construct and concurrent validity of a  
12 patient-reported adverse drug event questionnaire: a cross-sectional study. *Health Qual Life*  
13 *Outcomes*2014;12:103 doi:10.1186/s12955-014-0103-6 [published Online First: 13 August 2014].

14  
15 28 Podsiadlo D, Richardson S. The timed "Up & Go": a test of basic functional mobility for frail elderly  
16 persons. *J Am Geriatr Soc*1991;39:142-8 doi:10.1111/j.1532-5415.1991.tb01616.x.

17  
18 29 Solomon PR, Hirschhoff A, Kelly B, et al. A 7 minute neurocognitive screening battery highly  
19 sensitive to Alzheimer's disease. *Arch Neurol*1998;55:349-55 doi:10.1001/archneur.55.3.349.

20  
21 30 Reitan RM. The relation of the trail making test to organic brain damage. *J Consult*  
22 *Psychol*1955;19:393-4 doi:10.1037/h0044509.

23  
24 31 Wechsler D. Wechsler Adult Intelligence Scale. San Antonio: The Psychological Corporation 1997.

25  
26 32 Kempen GI, Suurmeijer TP. The development of a hierarchical polychotomous ADL-IADL scale for  
27 noninstitutionalized elders. *Gerontologist*1990;30:497-502 doi:10.1093/geront/30.4.497.

28  
29 33 Kempen GI, Miedema I, Ormel J, et al. The assessment of disability with the Groningen Activity  
30 Restriction Scale. Conceptual framework and psychometric properties. *Soc Sci Med*1996;43:1601-10  
31 doi:10.1016/S0277-9536(96)00057-3.

32  
33 34 EuroQol EQ-5D-3L. Available at: [www.euroqol.org](http://www.euroqol.org). Accessed Aug, 2014.

34  
35 35 Cohen J. A power primer. *Psychol Bull*1992;112:155-9 doi:10.1037/0033-2909.112.1.155.

36  
37 36 Torgerson DJ. Contamination in trials: is cluster randomisation the answer?. *BMJ*2001;322:355-7  
38 doi:10.1136/bmj.322.7282.355 [published Online First: 10 February 2001].

39  
40 37 Moore GF, Audrey S, Barker M, et al. Process evaluation of complex interventions: Medical  
41 Research Council guidance. *BMJ*2015;350:h1258 doi:10.1136/bmj.h1258 [published Online First: 19  
42 March 2015].

43  
44 38 Guthrie B, Kavanagh K, Robertson C, et al. Data feedback and behavioural change intervention to  
45 improve primary care prescribing safety (EFIPPS): multicentre, three arm, cluster randomised  
46 controlled trial. *BMJ*2016;354:i4079 doi:10.1136/bmj.i4079 [published Online First: 18 August 2016].

47  
48 39 Gould RL, Coulson MC, Patel N, et al. Interventions for reducing benzodiazepine use in older  
49 people: meta-analysis of randomised controlled trials. *Br J Psychiatry*2014;204:98-107  
50 doi:10.1192/bjp.bp.113.126003.

1  
2  
3 40 Tay HS, Soiza RL, Mangoni AA. Minimizing anticholinergic drug prescribing in older hospitalized  
4 patients: a full audit cycle. *Ther Adv Drug Saf*2014;5:121-8 doi:10.1177/2042098614523638  
5 [published Online First: 13 February 2014].  
6

7 41 Bpac nz. A practical guide to STOPPING MEDICINES in Older People. *BPJ* 2010;27(27).  
8 <https://bpac.org.nz/BPJ/2010/April/stopguide.aspx>.  
9

10 42 Wouters H, van der Meer H, Taxis K. Quantification of anticholinergic and sedative drug load with  
11 the Drug Burden Index: a review of outcomes and methodological quality of studies. *Eur J Clin*  
12 *Pharmacol*2017;73:257-66 doi:10.1007/s00228-016-2162-6 [published Online First: 1 December  
13 2016].  
14

15 43 Wouters H, Scheper J, Koning H, et al. Discontinuing inappropriate medication use in nursing  
16 home residents: A cluster randomized controlled trial. *Ann Intern Med* 2017;167:609-17  
17 doi:10.7326/M16-2729.  
18

19 44 Hazen AC, Sloeserwij VM, Zwart DL, et al. Design of the POINT study: Pharmacotherapy  
20 Optimisation through Integration of a Non-dispensing pharmacist in a primary care Team (POINT).  
21 *BMC Fam Pract*2015;16:76 doi:10.1186/s12875-015-0296-8 [published Online First: 2 June 2015].  
22  
23  
24  
25  
26  
27  
28  
29  
30  
31  
32  
33  
34  
35  
36  
37  
38  
39  
40  
41  
42  
43  
44  
45  
46  
47  
48  
49  
50  
51  
52  
53  
54  
55  
56  
57  
58  
59  
60



1  
2  
3  
4  
5  
6  
7  
8  
9  
10  
11  
12  
13  
14  
15  
16  
17  
18  
19  
20  
21  
22  
23  
24  
25  
26  
27  
28  
29  
30  
31  
32  
33  
34  
35  
36  
37  
38  
39  
40  
41  
42  
43  
44  
45  
46  
47  
48  
49  
50  
51  
52  
53  
54  
55  
56  
57  
58  
59  
60

Figure 1: Participant flow

\*All patients who had a baseline measurement.  
†All patients who were not lost to follow-up and received the intervention as allocated.

For peer review only

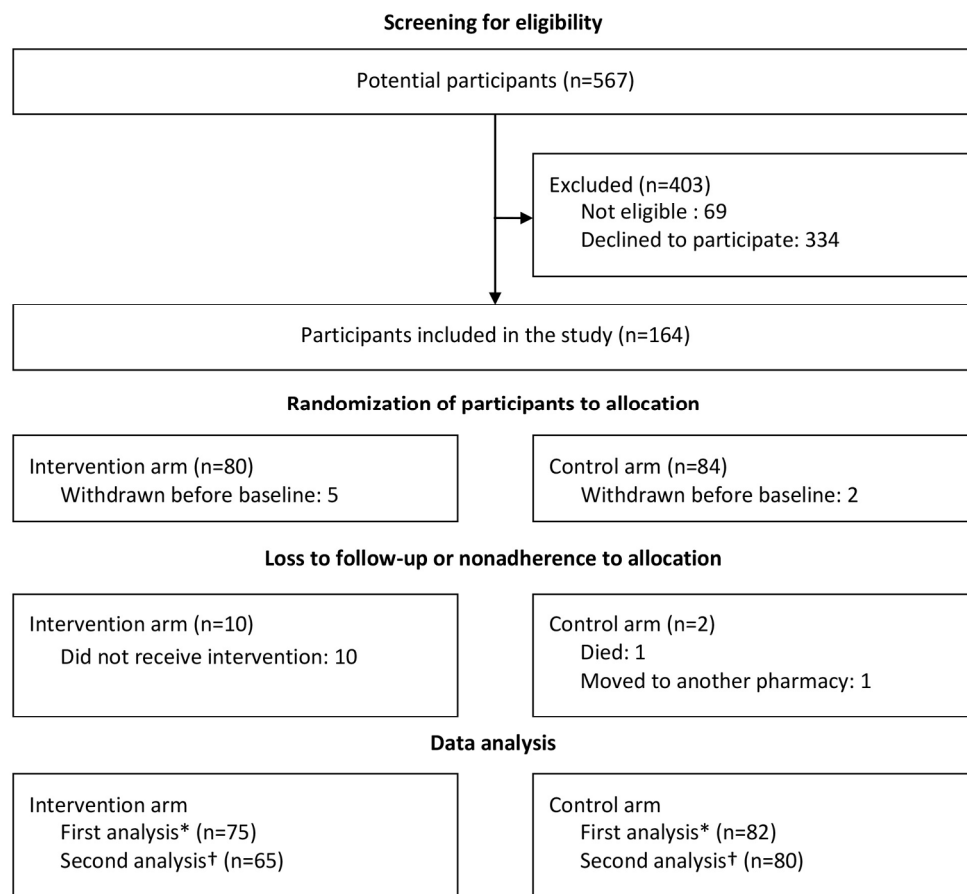

Figure 1: Participant flow/ \*All patients who had a baseline measurement.  
†All patients who were not lost to follow-up and received the intervention as allocated.

168x156mm (300 x 300 DPI)

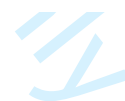

Appendix table 1: Secondary outcomes distribution and treatment in our study.

| Outcome                              | Measurement scale               | Best score measured | Worst score measured | Distribution               | Transformation | Cut-off points | Regression type   | Reporting                   |
|--------------------------------------|---------------------------------|---------------------|----------------------|----------------------------|----------------|----------------|-------------------|-----------------------------|
| <b>Cognitive function</b>            |                                 |                     |                      |                            |                |                |                   |                             |
| Trailmaking Test A                   | Time in seconds to finish       | 26                  | 202                  | Left skewed                | logarithmic    | N/A            | linear            | median (IQR)                |
| Trailmaking Test B                   | Time in seconds to finish       | 55                  | 439                  | Left skewed                | logarithmic    | N/A            | linear            | median (IQR)                |
| DSST                                 | Number of symbols correct       | 75                  | 7                    | Normal, with high variance | 5% classes     | N/A            | linear            | mean (SD)                   |
| 7MS enhanced cued recall             | Number of items recalled        | 16                  | 5                    | Ceiling effects            | dichotomized   | 15             | logistic          | % (n) in best scoring group |
| 7MS Benton temporal orientation      | Number of error points          | 0                   | 106                  | Floor effects              | dichotomized   | 5              | logistic          | % (n) in best scoring group |
| 7MS clock drawing                    | Number of correct items drawn   | 7                   | 1                    | Ceiling effects            | dichotomized   | 6              | logistic          | % (n) in best scoring group |
| 7MS category fluency                 | Number of animal names produced | 32                  | 5                    | Normal                     | N/A            | N/A            | linear            | mean (SD)                   |
| <b>Activities of daily living</b>    |                                 |                     |                      |                            |                |                |                   |                             |
| Groningen Activity Restriction Scale | Severity of problems            | 18                  | 66                   | Left skewed                | dichotomized   | 36             | logistic          | % (n) in best scoring group |
| <b>Side effects</b>                  |                                 |                     |                      |                            |                |                |                   |                             |
| Sedative side effects                | Severity/number of side effects | 0                   | 12                   | Negative binomial          | N/A            | N/A            | negative binomial | median (IQR)                |
| UKU                                  | Severity/number of side effects | 0                   | 84                   | Negative binomial          | N/A            | N/A            | negative binomial | median (IQR)                |
| <b>Quality of life</b>               |                                 |                     |                      |                            |                |                |                   |                             |
| EQ-5D-3L                             | Utilities                       | 1                   | -0.204               | Right skewed               | dichotomized   | 0,5            | logistic          | % (n) in best scoring group |
| EQ-5D-3L: Visual Analogue Scale      | Points on scale                 | 10                  | 2                    | Normal                     | N/A            | N/A            | linear            | mean (SD)                   |
| <b>Risk of falls</b>                 |                                 |                     |                      |                            |                |                |                   |                             |
| Up&Go test                           | Time in seconds                 | 6                   | 43                   | Dichotomous                | ≥15            | N/A            | logistic          | % (n) in best scoring group |

Appendix table 2: Sensitivity analysis of proportion of patients having a decrease in DBI  $\geq 0.5$ 

|                                       | Proportion with decrease of DBI $\geq 0.5$ , n/N (%) |              | Odds ratio (95% CI) * | p-value |
|---------------------------------------|------------------------------------------------------|--------------|-----------------------|---------|
|                                       | Intervention                                         | Control      |                       |         |
| DBI > 1.5                             | 12/64 (18.8)                                         | 13/78 (16.7) | 1.15 (0.49 to 2.74)   | 0.746   |
| DBI < 6                               | 12/64 (18.8)                                         | 13/79 (16.5) | 1.17 (0.49 to 2.78)   | 0.720   |
| Number of medications at baseline >5  | 12/61 (19.7)                                         | 12/78 (15.4) | 1.35 (0.56 to 3.25)   | 0.508   |
| Number of medications at baseline <20 | 12/65 (18.5)                                         | 13/79 (16.5) | 1.15 (0.48 to 2.73)   | 0.752   |
| Age >66                               | 12/65 (18.5)                                         | 12/77 (15.6) | 1.23 (0.51 to 2.95)   | 0.649   |
| Age <93                               | 12/64 (18.8)                                         | 13/79 (16.5) | 1.17 (0.49 to 2.78)   | 0.720   |

\* Binary logistic regression, unadjusted, according to second analysis.

Appendix table 3: Patients who had medications started, stopped and changed in dose at follow-up in intervention- and control arm.

| ATC code class                                                      | Intervention (n=65)      |                          | Control (n=80)           |                          |
|---------------------------------------------------------------------|--------------------------|--------------------------|--------------------------|--------------------------|
|                                                                     | DBI medication<br>(%, n) | All medication<br>(%, n) | DBI medication<br>(%, n) | All medication<br>(%, n) |
| <b>Started</b>                                                      |                          |                          |                          |                          |
| A (alimentary tract and metabolism)                                 | 7.7 (5)                  | 20.0 (13)                | 3.7 (3)                  | 11.3 (9)                 |
| R (respiratory system)                                              | 4.6 (3)                  | 12.3 (8)                 | 3.7 (3)                  | 7.5 (6)                  |
| N (nervous system)                                                  | 4.6 (3)                  | 6.2 (4)                  | 3.7 (3)                  | 7.5 (6)                  |
| M (musculo-skeletal system)                                         | 0 (0)                    | 6.2 (4)                  | 3.7 (3)                  | 5.0 (4)                  |
| C (cardiovascular system)                                           | 4.6 (3)                  | 6.2 (4)                  | 1.3 (1)                  | 2.5 (2)                  |
| B (blood and blood forming organs)                                  | 0 (0)                    | 10.8 (7)                 | 0 (0)                    | 7.5 (6)                  |
| L (antineoplastic and immune-modulating agents)                     | 1.5 (1)                  | 3.1 (2)                  | 0 (0)                    | 0 (0)                    |
| H (systemic hormonal preparations, excl. sex hormones and insulins) | 0 (0)                    | 1.5 (1)                  | 0 (0)                    | 0 (0)                    |
| G (genito urinary system and sex hormones)                          | 0 (0)                    | 0 (0)                    | 1.3 (1)                  | 1.3 (1)                  |
| S (sensory organs)                                                  | 0 (0)                    | 0 (0)                    | 0 (0)                    | 1.3 (1)                  |
| Total*                                                              | 20.0 (13)                | 43.1 (28)                | 13.8 (11)                | 33.8 (27)                |
| <b>Stopped</b>                                                      |                          |                          |                          |                          |
| A (alimentary tract and metabolism)                                 | 9.2 (6)                  | 21.5 (14)                | 2.5 (2)                  | 6.3 (5)                  |
| N (nervous system)                                                  | 13.8 (9)                 | 15.4 (10)                | 12.5 (10)                | 15.0 (12)                |
| C (cardiovascular system)                                           | 6.2 (4)                  | 9.2 (6)                  | 7.5 (6)                  | 10.0 (8)                 |
| B (blood and blood forming organs)                                  | 0 (0)                    | 9.2 (6)                  | 0 (0)                    | 6.3 (5)                  |
| R (respiratory system)                                              | 0 (0)                    | 7.7 (5)                  | 3.7 (3)                  | 13.8 (11)                |
| M (musculo-skeletal system)                                         | 3.1 (2)                  | 4.6 (3)                  | 5.0 (4)                  | 5.0 (4)                  |
| G (genito urinary system and sex hormones)                          | 3.1 (2)                  | 4.6 (3)                  | 1.3 (1)                  | 1.3 (1)                  |
| D (dermatologicals)                                                 | 0 (0)                    | 1.5 (1)                  | 0 (0)                    | 0 (0)                    |
| H (systemic hormonal preparations, excl. sex hormones and insulins) | 0 (0)                    | 0 (0)                    | 0 (0)                    | 2.4 (2)                  |
| L (antineoplastic and immune-modulating agents)                     | 0 (0)                    | 0 (0)                    | 1.3 (1)                  | 1.3 (1)                  |
| S (sensory organs)                                                  | 0 (0)                    | 0 (0)                    | 0 (0)                    | 1.3 (1)                  |
| Total*                                                              | 30.8 (20)                | 46.2 (30)                | 22.5 (18)                | 41.3 (33)                |
| <b>Dose change</b>                                                  |                          |                          |                          |                          |
| N (nervous system)                                                  | 21.5 (14)                | 23.1 (15)                | 21.3 (17)                | 22.5 (18)                |
| C (cardiovascular system)                                           | 10.8 (7)                 | 15.4 (10)                | 1.3 (1)                  | 2.5 (2)                  |
| A (alimentary tract and metabolism)                                 | 1.5 (1)                  | 4.6 (3)                  | 3.7 (3)                  | 3.8 (3)                  |
| R (respiratory system)                                              | 0 (0)                    | 1.5 (1)                  | 1.3 (1)                  | 1.3 (1)                  |
| B (blood and blood forming organs)                                  | 0 (0)                    | 1.5 (1)                  | 0 (0)                    | 0 (0)                    |
| M (musculo-skeletal system)                                         | 0 (0)                    | 1.5 (1)                  | 0 (0)                    | 0 (0)                    |
| H (systemic hormonal preparations, excl. sex hormones and insulins) | 0 (0)                    | 0 (0)                    | 0 (0)                    | 3.8 (3)                  |
| J (anti-infectives for systemic use)                                | 0 (0)                    | 0 (0)                    | 1.3 (1)                  | 1.3 (1)                  |
| Total*                                                              | 27.7 (18)                | 38.5 (25)                | 23.8 (19)                | 28.0 (23)                |
| <b>Total interventions</b>                                          | <b>53.8 (35)</b>         | <b>72.3 (47)</b>         | <b>45.0 (36)</b>         | <b>66.3 (53)</b>         |

ATC = Anatomical Therapeutic Chemical, classification by the WHO Collaborating Centre for Drug Statistics Methodology. Based on second analysis. \*Not sum of subtotals, as some patients had several interventions.

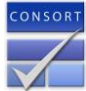

## CONSORT 2010 checklist of information to include when reporting a randomised trial\*

| Section/Topic                    | Item No | Checklist item                                                                                                                                                                              | Reported on page No |
|----------------------------------|---------|---------------------------------------------------------------------------------------------------------------------------------------------------------------------------------------------|---------------------|
| <b>Title and abstract</b>        |         |                                                                                                                                                                                             |                     |
|                                  | 1a      | Identification as a randomised trial in the title                                                                                                                                           | 1                   |
|                                  | 1b      | Structured summary of trial design, methods, results, and conclusions (for specific guidance see CONSORT for abstracts)                                                                     | 2-3                 |
| <b>Introduction</b>              |         |                                                                                                                                                                                             |                     |
| Background and objectives        | 2a      | Scientific background and explanation of rationale                                                                                                                                          | 4                   |
|                                  | 2b      | Specific objectives or hypotheses                                                                                                                                                           | 4                   |
| <b>Methods</b>                   |         |                                                                                                                                                                                             |                     |
| Trial design                     | 3a      | Description of trial design (such as parallel, factorial) including allocation ratio                                                                                                        | 4-5                 |
|                                  | 3b      | Important changes to methods after trial commencement (such as eligibility criteria), with reasons                                                                                          | N/A                 |
| Participants                     | 4a      | Eligibility criteria for participants                                                                                                                                                       | 5                   |
|                                  | 4b      | Settings and locations where the data were collected                                                                                                                                        | 4-5                 |
| Interventions                    | 5       | The interventions for each group with sufficient details to allow replication, including how and when they were actually administered                                                       | 5-6                 |
| Outcomes                         | 6a      | Completely defined pre-specified primary and secondary outcome measures, including how and when they were assessed                                                                          | 6-7                 |
|                                  | 6b      | Any changes to trial outcomes after the trial commenced, with reasons                                                                                                                       | N/A                 |
| Sample size                      | 7a      | How sample size was determined                                                                                                                                                              | 7                   |
|                                  | 7b      | When applicable, explanation of any interim analyses and stopping guidelines                                                                                                                | N/A                 |
| <b>Randomisation:</b>            |         |                                                                                                                                                                                             |                     |
| Sequence generation              | 8a      | Method used to generate the random allocation sequence                                                                                                                                      | 5                   |
|                                  | 8b      | Type of randomisation; details of any restriction (such as blocking and block size)                                                                                                         | 5                   |
| Allocation concealment mechanism | 9       | Mechanism used to implement the random allocation sequence (such as sequentially numbered containers), describing any steps taken to conceal the sequence until interventions were assigned | 5                   |
| Implementation                   | 10      | Who generated the random allocation sequence, who enrolled participants, and who assigned participants to interventions                                                                     | 5                   |
| Blinding                         | 11a     | If done, who was blinded after assignment to interventions (for example, participants, care providers, those                                                                                | 5                   |

|    |                          |                                                             |                                                                                                                  |
|----|--------------------------|-------------------------------------------------------------|------------------------------------------------------------------------------------------------------------------|
| 1  |                          | assessing outcomes) and how                                 |                                                                                                                  |
| 2  | 11b                      | If relevant, description of the similarity of interventions | N/A                                                                                                              |
| 3  | Statistical methods      | 12a                                                         | Statistical methods used to compare groups for primary and secondary outcomes                                    |
| 4  |                          | 12b                                                         | Methods for additional analyses, such as subgroup analyses and adjusted analyses                                 |
| 5  |                          |                                                             |                                                                                                                  |
| 6  | <b>Results</b>           |                                                             |                                                                                                                  |
| 7  | Participant flow (a      | 13a                                                         | For each group, the numbers of participants who were randomly assigned, received intended treatment, and         |
| 8  | diagram is strongly      |                                                             | were analysed for the primary outcome                                                                            |
| 9  | recommended)             | 13b                                                         | For each group, losses and exclusions after randomisation, together with reasons                                 |
| 10 | Recruitment              | 14a                                                         | Dates defining the periods of recruitment and follow-up                                                          |
| 11 |                          | 14b                                                         | Why the trial ended or was stopped                                                                               |
| 12 | Baseline data            | 15                                                          | A table showing baseline demographic and clinical characteristics for each group                                 |
| 13 | Numbers analysed         | 16                                                          | For each group, number of participants (denominator) included in each analysis and whether the analysis was      |
| 14 |                          |                                                             | by original assigned groups                                                                                      |
| 15 |                          |                                                             |                                                                                                                  |
| 16 |                          |                                                             |                                                                                                                  |
| 17 | Outcomes and             | 17a                                                         | For each primary and secondary outcome, results for each group, and the estimated effect size and its            |
| 18 | estimation               |                                                             | precision (such as 95% confidence interval)                                                                      |
| 19 |                          | 17b                                                         | For binary outcomes, presentation of both absolute and relative effect sizes is recommended                      |
| 20 | Ancillary analyses       | 18                                                          | Results of any other analyses performed, including subgroup analyses and adjusted analyses, distinguishing       |
| 21 |                          |                                                             | pre-specified from exploratory                                                                                   |
| 22 |                          |                                                             |                                                                                                                  |
| 23 | Harms                    | 19                                                          | All important harms or unintended effects in each group (for specific guidance see CONSORT for harms)            |
| 24 |                          |                                                             |                                                                                                                  |
| 25 | <b>Discussion</b>        |                                                             |                                                                                                                  |
| 26 |                          |                                                             |                                                                                                                  |
| 27 |                          |                                                             |                                                                                                                  |
| 28 | Limitations              | 20                                                          | Trial limitations, addressing sources of potential bias, imprecision, and, if relevant, multiplicity of analyses |
| 29 | Generalisability         | 21                                                          | Generalisability (external validity, applicability) of the trial findings                                        |
| 30 | Interpretation           | 22                                                          | Interpretation consistent with results, balancing benefits and harms, and considering other relevant evidence    |
| 31 |                          |                                                             |                                                                                                                  |
| 32 | <b>Other information</b> |                                                             |                                                                                                                  |
| 33 | Registration             | 23                                                          | Registration number and name of trial registry                                                                   |
| 34 | Protocol                 | 24                                                          | Where the full trial protocol can be accessed, if available                                                      |
| 35 | Funding                  | 25                                                          | Sources of funding and other support (such as supply of drugs), role of funders                                  |
| 36 |                          |                                                             |                                                                                                                  |
| 37 |                          |                                                             |                                                                                                                  |
| 38 |                          |                                                             |                                                                                                                  |

39 \*We strongly recommend reading this statement in conjunction with the CONSORT 2010 Explanation and Elaboration for important clarifications on all the items. If relevant, we also  
 40 recommend reading CONSORT extensions for cluster randomised trials, non-inferiority and equivalence trials, non-pharmacological treatments, herbal interventions, and pragmatic trials.  
 41 Additional extensions are forthcoming: for those and for up to date references relevant to this checklist, see [www.consort-statement.org](http://www.consort-statement.org).

# BMJ Open

## Reducing the anticholinergic and sedative load in older patients on polypharmacy by pharmacist-led medication review: A randomized controlled trial

|                                 |                                                                                                                                                                                                                                      |
|---------------------------------|--------------------------------------------------------------------------------------------------------------------------------------------------------------------------------------------------------------------------------------|
| Journal:                        | <i>BMJ Open</i>                                                                                                                                                                                                                      |
| Manuscript ID                   | bmjopen-2017-019042.R2                                                                                                                                                                                                               |
| Article Type:                   | Research                                                                                                                                                                                                                             |
| Date Submitted by the Author:   | 29-Mar-2018                                                                                                                                                                                                                          |
| Complete List of Authors:       | van der Meer, Helene; University of Groningen, Wouters, Hans; University of Groningen<br>Pont, Lisa; University of Technology Sydney, Pharmacy<br>Taxis, Katja; University of Groningen, Faculty of Mathematics and Natural Sciences |
| <b>Primary Subject Heading</b>: | Patient-centred medicine                                                                                                                                                                                                             |
| Secondary Subject Heading:      | Geriatric medicine                                                                                                                                                                                                                   |
| Keywords:                       | AGED, DRUG BURDEN INDEX, MEDICATION REVIEW, MUSCARINIC ANTAGONISTS, POLYPHARMACY, DEPRESCRIBING                                                                                                                                      |
|                                 |                                                                                                                                                                                                                                      |

SCHOLARONE™  
Manuscripts



1  
2  
3 **Reducing the anticholinergic and sedative load in older patients on**  
4 **polypharmacy by pharmacist-led medication review: A randomized**  
5 **controlled trial**  
6  
7  
8  
9  
10

- 11 1. Helene G van der Meer\*, MSc, Groningen Research Institute of Pharmacy, Unit of  
12 Pharmacotherapy, -Epidemiology & -Economics, University of Groningen, Antonius  
13 Deusinglaan 1, 9713 AV Groningen, The Netherlands. Email: h.g.van.der.meer@rug.nl  
14  
15 2. Hans Wouters, PhD, Groningen Research Institute of Pharmacy, Unit of Pharmacotherapy, -  
16 Epidemiology & -Economics, & Department of General Practice, University Medical Centre  
17 Groningen, University of Groningen, Groningen, The Netherlands.  
18  
19 3. Lisa G Pont, PhD, Discipline of Pharmacy, Graduate School of Health, University of Technology  
20 Sydney, Sydney, Australia.  
21  
22 4. Katja Taxis, PhD, Groningen Research Institute of Pharmacy, Unit of Pharmacotherapy, -  
23 Epidemiology & -Economics, University of Groningen, Groningen, The Netherlands.  
24  
25

26 \*Corresponding author.  
27  
28  
29  
30

31 **Keywords:** aged; drug burden index; medication review; muscarinic antagonists; polypharmacy;  
32 deprescribing  
33

34 **Word count:** 3768  
35

36 **Tables:** 3  
37

38 **Figure:** 1  
39

40 **Appendices:** 3  
41  
42  
43  
44  
45  
46  
47  
48  
49  
50  
51  
52  
53  
54  
55  
56  
57  
58  
59  
60

## ABSTRACT

### OBJECTIVE

To evaluate if a pharmacist-led medication review is effective at reducing the anticholinergic/sedative load, as measured by the Drug Burden Index (DBI).

### DESIGN

Randomized controlled single blind trial.

### SETTING

15 community pharmacies in the Northern Netherlands.

### PARTICIPANTS

157 community-dwelling patients aged  $\geq 65$  years who used  $\geq 5$  medicines for  $\geq 3$  months, including at least one psycholeptic/psychoanaleptic medication, and who had a DBI  $\geq 1$ .

### INTERVENTION

A medication review by the community pharmacist in collaboration with the patient's general practitioner and patient.

### PRIMARY AND SECONDARY OUTCOMES MEASURES

The primary outcome was the proportion of patients whose DBI decreased by at least 0.5. Secondary outcomes were the presence of anticholinergic/sedative side effects, falls, cognitive function, activities of daily living, quality of life, hospital admission, and mortality. Data were collected at baseline and three-months follow-up.

### RESULTS

Mean participant age was 75.7 (SD, 6.9) years in the intervention arm and 76.6 (SD, 6.7) years in the control arm, the majority were female (respectively 69.3% and 72.0%). Logistic regression analysis showed no difference in the proportion of patients with a  $\geq 0.5$  decrease in DBI between intervention arm (17.3%) and control arm (15.9%), (OR 1.04, CI 0.47 to 2.64,  $p=0.927$ ). Intervention patients scored higher on the digit symbol substitution test, measure of cognitive function, (OR 2.02, CI 1.11 to 3.67,  $p=0.021$ ), and reported fewer sedative side effects (OR 0.61, CI 0.40 to 0.94,  $p=0.024$ ) at follow-up. No significant difference was found for other secondary outcomes.

### CONCLUSIONS

1  
2  
3 Pharmacist-led medication review as currently performed in the Netherlands was not effective in  
4 reducing the anticholinergic/sedative load, measured with the DBI, within the time frame of 3 months.  
5 Preventive strategies, signalling a rising load and taking action before chronic use of  
6 anticholinergic/sedative medication is established, may be more successful.  
7  
8

### 9 **TRIAL REGISTRATION**

10  
11 Clinical trials NCT02317666.  
12  
13  
14  
15

### 16 **STRENGTHS AND LIMITATION OF THIS STUDY**

- 17  
18 • A successfully completed randomized controlled trial, which was the first to focus on  
19 changing anticholinergic and sedative load by medication review.  
20
- 21 • Appropriately powered to detect a clinically relevant medium difference.  
22
- 23 • Showing the effect of “real world” practiced medication review, rather than the theoretical  
24 approach described in guidelines.  
25
- 26 • Three-months follow-up might have been too short to detect full effects of medication review,  
27 e.g. due to stepwise reduction of medication, however very few dosage changes were seen.  
28  
29  
30  
31  
32  
33  
34  
35  
36  
37  
38  
39  
40  
41  
42  
43  
44  
45  
46  
47  
48  
49  
50  
51  
52  
53  
54  
55  
56  
57  
58  
59  
60

## BACKGROUND

Older people suffer from many medical conditions and use more medication than any other age group. Multiple medication use in combination with age-related physiological changes increase the risk of medication related harm including adverse drug events, drug-drug- and drug-disease-interactions. [1] Medications with anticholinergic and/or sedative properties are of particular concern in older people, because they worsen cognitive impairment and physical functioning, increase the risk of falls and negatively impact activities of daily living, hospitalization, and mortality. [2, 3] Despite the risks, these medications are commonly prescribed to older individuals. [4, 5] Different measures have been developed to quantify the anticholinergic load in patients. [6] The Drug Burden Index (DBI) determines an individual's exposure to anticholinergic and sedative medication taking into account the dose. [7, 8] A high DBI has been associated with impairments in both physical- and cognitive function among older individuals. [9, 10] Hence, decreasing exposure to anticholinergic and sedative medication, as measured by the DBI, may have important health benefits in older people.

Two small Australian studies suggest that medication review could be a promising strategy in reducing the DBI in community dwelling older people. [11, 12] Medication review is 'a structured critical examination of a person's medicines with the objective of reaching an agreement with the person about treatment, optimising the impact of medicines, minimising the number of medication-related problems and reducing waste'. [13] While meta-analyses of studies in different settings show a lack of effectiveness on outcomes such as mortality or hospital (re-) admissions, [14-16] these studies included different types of medication review. Well-structured medication review with good cooperation between pharmacist and GP and involvement of the patient were most likely to be successful. [17, 18] Furthermore fee-for-pharmacist-led medication review seemed to have positive health benefits on the patient. [19] The most effective method for medication review remains unknown. Focusing on specific subgroups such as older people with multiple comorbidities and polypharmacy, [20] or patients suffering from pain [21] may be one strategy to optimize medication review associated benefits. To date, there is no consensus on the effectiveness of medication review as a strategy to reduce anticholinergic and sedative load as measured by the DBI. Therefore, the primary aim of this study was to evaluate if a medication review is an effective strategy to reduce anticholinergic and sedative load as measured by the DBI. Secondly, we evaluated the effect of a medication review on patient outcomes including cognitive function, risk of falls, activities of daily living and quality of life.

## METHODS

### Study design, setting & participants

1  
2  
3 We conducted a randomized controlled, single blind trial in 15 community pharmacies from December  
4 2014 until October 2015 in the Northern Netherlands. Pharmacies were recruited via the regional  
5 association of pharmacists and participation was voluntary. One pharmacist per pharmacy was  
6 involved in the study. In Dutch community pharmacy practice, all registered pharmacists are allowed  
7 to perform medication reviews. Furthermore, pharmacists collaborate with GPs in their area. This  
8 includes local regular meetings of pharmacists and GPs in pharmacotherapy counselling groups. [22]  
9 In the Netherlands, each individual is registered with a single pharmacy. [23] Pharmacies hold a  
10 complete electronic medication history for each patient registered with them. When undertaking a  
11 medication review it is routine practice of pharmacists to obtain an extensive summary of the  
12 electronic patients' medical records, including latest recorded episodes and lab-values, from the GP.  
13 [24] At the time of the study, all Dutch community pharmacists were required to perform medication  
14 reviews in cooperation with the GP for high-risk patients according to the guidelines. [25] Patients  
15 who were aged  $\geq 65$  years, living independently, using  $\geq 5$  medications for  $\geq 3$  months, including at  
16 least one psycholeptic or psychoanaleptic medication (Anatomic Therapeutic Classification (ATC)  
17 code N05 or N06), [26] and with a DBI  $\geq 1$  were identified by the pharmacist and invited to participate  
18 in the study. Exclusion criteria were limited life expectancy ( $< 3$  months), non-Dutch language speaker  
19 or advanced dementia. Patients who had received a medication review within the past 9 months before  
20 the study period and patients who needed a medication review urgently were also excluded. Exclusion  
21 criteria were identified by the pharmacist with whom the patient was registered. This study was  
22 approved by the Medical Ethical Committee of the University Medical Centre of Groningen, The  
23 Netherlands (protocol number METc 2014/392). The study protocol has been published elsewhere.  
24 [27]

### 36 **Randomization, allocation & blinding**

37 Eligible patients were approached by the pharmacist and asked to provide written informed consent. In  
38 each pharmacy, patients willing to participate were then matched in pairs by gender, age, DBI and  
39 number of medications. One patient of each pair was randomly assigned to the intervention condition.  
40 All participants gave written consent prior to the intervention allocation. The randomization process  
41 was conducted by the principal investigator, who was not involved in recruitment or data collection.  
42 The researchers who enrolled the patients and collected the data were kept blind to the allocation.  
43 Pharmacists and patients could not be kept blind, but were explicitly asked not to reveal study  
44 allocation for individual patients to the researchers who collected the data. Therefore this was a single  
45 blind study.

### 52 **Intervention**

53 The intervention was a medication review conducted by the community pharmacist in close  
54 collaboration with the patients' GP and, if needed, other medical specialists. In the Netherlands  
55 medication review consisted of five steps. [25] Step one was a face-to-face consultation between the  
56  
57  
58  
59

1  
2  
3 pharmacist and patient to discuss medication use. Second, the pharmacist undertook a  
4 pharmacotherapeutic medication review, identified potential pharmacotherapeutic problems taking  
5 into account the patient's medical records, including latest recorded episodes and lab-values.  
6 Accordingly the pharmacist drafted written recommendations for medication optimisation to discuss  
7 with the patients' GP. Third, a multidisciplinary meeting, between pharmacist and GP was held. At  
8 this meeting, the potential medication problems of the patient were discussed and draft of a  
9 pharmacotherapeutic action plan was decided. Fourth, a discussion of the draft pharmacotherapeutic  
10 action plan between patient and pharmacist and/or GP. The patients' expectations and wishes were key  
11 elements in the decision-making process and were included in the final action plan. Fifth, a follow-up  
12 of the final pharmacotherapeutic action plan was undertaken. Further detail of the medication review  
13 process and the Dutch guideline underpinning the study can be found in our previously published  
14 study protocol. [27] The pharmacists participating in the study all undertook regular medication  
15 reviews as part of their practice and as such were familiar with the guideline. Nonetheless, we  
16 provided the guidelines to the pharmacists with the request to focus on anticholinergic and sedative  
17 medications. No additional educational material on anticholinergic and sedative medication was  
18 provided. In order to get a reflection of 'real world' practice, we let the pharmacists perform the  
19 medication reviews according to their routine practice, but we did check whether all 5 steps were  
20 conducted. The medication review took place within days after the baseline measurement for the  
21 intervention patients. In the control arm, patients received the medication review after the study  
22 period.

### 33 **Outcomes**

34 The primary outcome was defined as the difference in proportion of patients having a decrease of DBI  
35  $\geq 0.5$  at 3-months follow-up. We chose a 3-months follow-up because this was a reasonable time  
36 frame to detect medication changes by the medication review. A longer follow-up would have  
37 increased the chance of medication changes due to other reasons, such as changes in disease status.  
38 Our hypothesis was that the proportion with a 0.5 decrease in DBI would be higher in the intervention  
39 arm compared to the control arm. We chose 0.5, as this equals the cessation of one drug, which we  
40 considered a clinically relevant decrease. The DBI was calculated using the following formula [8]:  
41  
42  
43  
44

$$45 \text{ DBI} = \sum \frac{D}{D + \delta}$$

46  
47  
48 D = daily dose,  $\delta$  = minimum recommended daily dose were derived for the study from Dutch  
49 standard reference sources. [28, 29] Except for sensory and dermatological preparations, all chronic  
50 medications (i.e. those used for  $\geq 3$  months) with anticholinergic properties (dry mouth, constipation  
51 and urine retention) and sedative properties based on Dutch standard reference sources [28-30] were  
52 included in the calculation. Medication data were derived from electronic pharmacy dispensing data  
53 and were verified with the patient.  
54  
55  
56  
57  
58  
59  
60

We included the following secondary outcomes: anticholinergic side effects, measured by the Udvalg for Kliniske Undersogelser (UKU) side effect rating scale, [31] sedative side effects, derived from a patient-reported adverse drug event questionnaire, [32] and risk of falls, determined by the Up & Go test. [33] Cognitive function was measured using validated tests for memory and executive function, namely the Seven Minute Screen (7MS), [34] the Trailmaking Test A & B, [35] and Digit Symbol Substitution Test (DSST). [36] The latter has also previously been used to examine the validity of the DBI. [8] Activities of daily living were derived using the validated Groningen Activity Restriction Scale (GARS), [37, 38] and quality of life was measured by the Euroqol-5 Dimension-3 Level (EQ-5D-3L) questionnaire, including visual analogue scale (VAS). [39] All tools were administered in Dutch and data were collected in a standardized manner, using data collection sheets, by researchers who were trained by a psychologist. Data collection took place at baseline and 3-months follow-up for both allocations. Patients with the inability to walk were excluded from the Up&Go test and the GARS questionnaire. At follow-up the number of fall incidents, hospital admission, and mortality was assessed based on patient/relative reporting.

#### **Sample size calculation**

To the best of our knowledge, only one randomized pilot study has been conducted assessing the DBI. [12] We therefore could not calculate the sample size 'a priori'. However we estimated a sample size based on a power of 80% at a significance of 0.05 and an intra-class correlation coefficient up to 0.2 to detect a medium effect size on the primary outcome. [40] We chose a medium effect size as we considered a small effect size to be not clinically relevant and a power to detect a medium effect size also to be capable of detecting a large effect size. For this calculation around 160 participants (80 in control arm and 80 in intervention arm) were needed. We expected a non-response rate of 60% and therefore aimed to invite 400 patients to participate in the study.

#### **Statistical analysis**

We performed two analyses. In the first analysis we included all patients with a baseline measurement. In the second analysis, we included all patients who were not lost to follow-up, and who received the intervention as allocated. Descriptive statistics were calculated for both allocation arms at baseline. For the analysis of the primary outcome, we initially considered a generalized linear mixed effects model to adjust for dependence of observations (i.e. clustering of patients within pharmacies). However, as the intra-class correlation was not significant and no significant clustering was observed, extension of the model with random effects at the level of pharmacies was not necessary. Therefore, only fixed effects were considered and standard fixed effects logistic regression model applied. Most secondary outcomes were examined with standard regression models. Variables with a skewed distribution were transformed before analysis. For dichotomous variables we reported percentages and numbers of patients in the best scoring group, for skewed variables we report the median and interquartile range and for normally distributed data we report the mean and standard deviation.

1  
2  
3 Further detail on the analysis of secondary outcome tests and –questionnaires data can be found in  
4 appendix table 1. Reported falls, hospitalization and mortality were only assessed from patients with a  
5 follow-up measurement. These variables were dichotomized, reported as number and percentages of  
6 patients and analysed using Fisher’s exact test. A sensitivity analysis was conducted on outliers  
7 (appendix table 2) and all analyses were adjusted for gender, age, and number of medication at  
8 baseline. Secondary outcomes were also adjusted for baseline scores. Analyses were done in SPSS 24  
9 and MLwiN 2.36, statistical tests were two-sided and conducted at the 5% significance level.

### 13 14 **Missing data**

15 Few data were missing for the primary outcome. Of the two patients, who were lost to follow-up, the  
16 baseline observation for medication use was carried forward to follow-up. For eight patients,  
17 medication use could not be verified with the patient, as they could not be reached by telephone  
18 despite several attempts. For these patients, the medication data from the pharmacy dispensing system  
19 were used. For secondary outcomes, 5.3% of data were missing in the complete dataset, mostly at  
20 follow-up (4.8%). In the intervention arm, 7.0% of data was missing (6.1% at follow-up) across 18  
21 patients, whereas in the control arm 3.7% was missing (3.4% at follow-up) across 12 patients. In total  
22 30 patients had missing data, of whom two were lost to follow-up. Eight patients were not able to  
23 complete one or more cognitive tests (0.5% of all data). Eleven patients could not be tested at follow-  
24 up within the study period, six patients due to sickness, four patients due to practical reasons (despite  
25 numerous attempts we were unsuccessful to arrange an appointment for the follow-up measurement),  
26 and one patient had died two days before the follow-up appointment. A few data were missing for  
27 other reasons across nine patients, for example patients forgetting their glasses, due to time  
28 constraints, or other reasons.

29 Missing data in cognitive tests due to inability of the patient to complete the task were replaced with  
30 the worst score for that specific group. Missing data of patients who could not be tested at follow-up  
31 within the study period, or who had missing data for other reasons were replaced by multiple  
32 imputation (five times) in SPSS 24. In this paper we report on the imputed dataset. Sensitivity analysis  
33 showed no difference between the dataset with and without missing data.

### 36 37 38 **Patient and Public involvement**

39 Patients and or public were not involved in the design or conduct of the study. After the study period  
40 all participants received a thank you letter including a brief summary of the overall results.

## 44 45 46 47 48 49 50 51 **RESULTS**

### 52 53 54 **Participant flow**



Overall, 498 patients were approached for participation, 164 patients provided informed consent (32.9% response rate), and 157 patients completed at least the baseline measurement and were included in the first analysis (Figure 1). The drop-out rate was 4.3%.

### Participant characteristics

The average participant age was 75.7 (SD, 6.9) years in the intervention arm and 76.6 (SD, 6.7) years in the control arm, and the majority were female (respectively 69.3% and 72.0%). Participants in the control arm used slightly more medicines at baseline (9.3 (SD, 3.2) to 8.4 (SD,2.4)), and more control patients were living with a partner (53.6% to 44%) (Table 1).

Table 1 Demographic characteristics at baseline.

|                                                   | Intervention (n=75) | Control (n=82) |
|---------------------------------------------------|---------------------|----------------|
| <b>Age (years) mean (SD)</b>                      | 75.7 (6.9)          | 76.6 (6.7)     |
| <b>Sex (female) (n (%))</b>                       | 52 (69.3)           | 59 (72.0)      |
| <b>Number of medicines (mean (SD))</b>            | 8.4 (2.4)           | 9.3 (3.2)      |
| <b>DBI (mean (SD))</b>                            | 3.1 (1.0)           | 3.2 (1.0)      |
| <b>Marital status (n (%))</b>                     |                     |                |
| <b>Partner</b>                                    | 33 (44.0)           | 44 (53.6)      |
| <b>Widow/widower/Divorced/single</b>              | 34 (45.3)           | 32 (39.0)      |
| <b>Unknown</b>                                    | 8 (10.6)            | 6 (7.3)        |
| <b>Level of education (n (%))</b>                 |                     |                |
| <b>No/ low/ middle</b>                            | 58 (77.3)           | 64 (78.0)      |
| <b>High</b>                                       | 9 (12.0)            | 13 (15.8)      |
| <b>Unknown</b>                                    | 8 (10.6)            | 5 (6.0)        |
| <b>Medication use at baseline (top 5 (n (%)))</b> |                     |                |
| <b>ATC Nervous system</b>                         | 75 (100)            | 82 (100)       |
| <b>ATC Cardiovascular</b>                         | 70 (93.3)           | 74 (90.2)      |
| <b>ATC Alimentary tract</b>                       | 64 (85.3)           | 71 (86.6)      |
| <b>ATC Blood/ blood forming organs</b>            | 49 (65.3)           | 46 (56.1)      |
| <b>ATC Respiratory tract</b>                      | 20 (26.7)           | 38 (46.3)      |

### Primary outcome

In the first analysis, which included all patients with a baseline measurement, the proportion of patients with a decrease of DBI  $\geq 0.5$  did not differ between patients in intervention- and control arm (17.3% to 15.9%, OR 1.04, CI 0.47 to 2.64,  $p=0.927$ ). Similar results were obtained in the second analysis, which included all patients who were not lost to follow-up, and who received the intervention

as allocated (Table 2). Descriptive analysis showed medication changes (starting, stopping, dosage change) of DBI medications on ATC code level 1 in 53.8% of patients from intervention arm and in 45.0% of patients from control arm. For cardiovascular DBI medications, dose increases and – decreases of different medications occurred in 10.8% patients from intervention arm compared to 1.3% of patients from control arm (Appendix table 3).

Table 2: Proportion of patients having a decrease in DBI  $\geq 0.5$  by analysis type

| Analysis type           | Proportion with decrease of DBI $\geq 0.5$ (% , n) |           | Odds ratio (95% CI) * | p-value |
|-------------------------|----------------------------------------------------|-----------|-----------------------|---------|
|                         | Intervention                                       | Control   |                       |         |
| First analysis (n=157)  | 17.3 (13)                                          | 15.9 (13) | 1.04 (0.47 to 2.64)   | 0.927   |
| Second analysis (n=145) | 18.5 (12)                                          | 16.3 (13) | 1.09 (0.45 to 2.63)   | 0.857   |

\* Binary logistic regression, adjusted for age, gender, number of medication at baseline.

First analysis: all patients with a baseline measurement

Second analysis: all patients who were not lost to follow-up, and who received the intervention as allocated

### Secondary outcome

Secondary outcome tests and - questionnaires were analysed including all patients who were not lost to follow-up and who received the intervention as allocated (Table 3). A difference was seen in the DSST and reporting of sedative side effects between allocation arms. Patients in the intervention arm scored higher at follow-up on average (3 (SD, 1) to 1 (SD, 0) point (s), OR 2.02, CI 1.11 to 3.67,  $p=0.021$ ) and reported less sedative side effects at follow up compared to the control arm (-1 (IQR, -2) to 1 (IQR, 0) point(s), OR 0.61, CI 0.40 to 0.94,  $p=0.024$ ). For all other secondary outcomes no difference was found between intervention and control arm.

Table 3: Secondary outcome tests and - questionnaires at follow-up

| Outcome                                     | Intervention (n=65) |                  | Control (n=80)   |                  | Treatment difference at FU (95% CI) |
|---------------------------------------------|---------------------|------------------|------------------|------------------|-------------------------------------|
|                                             | BL score            | $\Delta$ with FU | BL score         | $\Delta$ with FU |                                     |
| <b>Trailmaking Test A,</b><br>median (IQR)  | 59.0 (36.9)         | -8.4 (-4.8)      | 61.0 (27.8)      | -6.0 (1.6)       | -0.01 (-0.11 - 0.09) <sup>†</sup>   |
| <b>Trailmaking Test B,</b><br>median (IQR)  | 149.0<br>(103.0)    | -3.9 (24.1)      | 152.0<br>(103.0) | 1.0 (19.0)       | -0.01 (-0.14 - 0.11) <sup>†</sup>   |
| <b>DSST, mean (SD)</b>                      | 36.4 (12.2)         | 2.6 (1.2)        | 36.4 (13.2)      | 1.0 (-0.3)       | 0.70 (0.11 - 1.30) <sup>†*</sup>    |
| <b>7MS enhanced cued recall, % (n) best</b> | 85 (55)             | 0 (0)            | 84 (71)          | 5 (4)            | 0.54 (0.15 - 1.90) <sup>‡</sup>     |

|                                              |             |             |             |             |                                   |
|----------------------------------------------|-------------|-------------|-------------|-------------|-----------------------------------|
| scoring                                      |             |             |             |             |                                   |
| <b>7MS Benton</b>                            | 95 (62)     | -3 (-2)     | 99 (79)     | -4 (-3)     | 1.38 (0.28 - 6.88) <sup>‡</sup>   |
| <b>temporal orientation, % (n)</b>           |             |             |             |             |                                   |
| best scoring                                 |             |             |             |             |                                   |
| <b>7MS clock drawing, % (n) best scoring</b> | 80 (52)     | -8 (-5)     | 86 (69)     | -6 (-5)     | 0.67 (0.28 - 1.62) <sup>‡</sup>   |
| <b>7MS category fluency, mean (SD)</b>       | 16.1 (5.5)  | 0.1 (-0.6)  | 15.9 (5.0)  | 0.4 (-0.3)  | -0.18 (-1.55 - 1.20) <sup>†</sup> |
| <b>GARS, % (n) best scoring</b>              | 72 (46)     | 2 (-1)      | 69 (54)     | 0 (0)       | 1.73 (0.62 - 4.84) <sup>‡0</sup>  |
| <b>Sedative side effects, median (IQR)</b>   | 3.0 (5.0)   | -1.0 (-2.0) | 2.0 (4.0)   | 1 (0)       | 0.61 (0.40 - 0.94) <sup>‡*</sup>  |
| <b>UKU, median (IQR)</b>                     | 17.0 (22.0) | -3.0 (1.0)  | 18.0 (27.0) | -1.6 (-2.4) | 0.97 (0.67 - 1.39) <sup>§</sup>   |
| <b>EQ-5D-3L, % (n) best scoring</b>          | 74 (48)     | 9 (6)       | 76 (61)     | 4 (3)       | 1.43 (0.51 - 4.03) <sup>‡</sup>   |
| <b>VAS, mean (SD)</b>                        | 6.6 (1.6)   | -0.2 (0.0)  | 6.8 (1.4)   | -0.1 (0.1)  | -0.09 (-0.50 - 0.32) <sup>†</sup> |
| <b>Up&amp;Go, % (n) best scoring</b>         | 66 (42)     | 0 (0)       | 64 (50)     | 4 (3)       | 1.37 (0.60 - 3.14) <sup>‡0</sup>  |

BL = Baseline, FU = Follow-up, DSST = Digit Symbol Substitution Test; 7MS = Seven Minute Screen; GARS = Groningen Activities Restriction Scale; UKU = Udvalg for Kliniske Undersogelser (measuring anticholinergic side effects); VAS = visual analogue scale (part of EQ-5D-3L).

<sup>†</sup>Linear regression analysis (reporting unstandardized b), <sup>‡</sup>logistic regression analysis (reporting odds ratio), <sup>§</sup>negative binomial regression analysis (reporting incident rate ratio) used, all adjusted for age, gender, number of medication at baseline. \*Statistically significant difference ( $p < 0.05$ ). <sup>0</sup>Deviation of number of patients: n=64 for intervention, n=78 for control, 3 patients were excluded from this test/questionnaire.

Reported falls and hospitalization could be assessed from 136 patients who were included in the second analysis. No significant difference was found in reported falls between control- and intervention arm, respectively 15 patients (19.5%) versus 18 patients (30.5%), ( $p=0.100$ ). There was also no difference found between control- and intervention arm in hospitalization, 9 (11.7%) versus 3 (5.1%) patients reported unplanned hospital admission, ( $p=0.149$ ). Of all patients who were included in the study, 2 died, 1 (1.2%) in control arm to 1 (1.3%) intervention arm, ( $p=0.732$ ).

## DISCUSSION

1  
2  
3 In our study pharmacist-led medication review did not reduce the anticholinergic and/or sedative  
4 medication load in older people within the first 3-months following review. In addition, medication  
5 review did not improve cognitive function, apart from the DSST. We also found that medication  
6 review had no effect on anticholinergic side effects, quality of life, activities of daily living, risk of  
7 falls, hospitalization, and mortality. However, intervention patients reported fewer sedative side  
8 effects.  
9  
10

### 11 12 **Strengths and limitations of the study**

13  
14 This randomized controlled trial was the first to focus on changing anticholinergic and sedative  
15 medication load by medication review. The trial was completed successfully, allocation arms were  
16 comparable and we achieved a medium response rate. We also believe our study was appropriately  
17 powered to detect a clinically relevant medium difference between intervention and control arm. Yet  
18 there are some methodological limitations that should be considered when interpreting our findings.  
19 Firstly, our study design might have introduced a risk of contamination between intervention- and  
20 control arm, as pharmacists and GPs could have been triggered to optimize medication use also for  
21 patients in the control arm during the study period. We know from the pharmacists that no structured  
22 medication reviews were performed for control patients during the study period. Therefore we believe  
23 that changes we observed in control patients were due to usual care. Cluster randomization may have  
24 prevented the chance of contamination, but this method has other disadvantages. [41] Second,  
25 although we did check whether all steps of the medication review were conducted, it was outside the  
26 scope of our study to investigate to what extent pharmacists adhered to methods recommended by the  
27 guideline on performing the medication review. Informal conversations with pharmacists suggested  
28 that although the guidelines recommend a face-to-face meeting between the pharmacist and GP, some  
29 pharmacists contacted the GP by phone, fax, or email due to lack of time. This might have had an  
30 effect on the implementation of medication suggestions. [18] Furthermore, while as part of the  
31 established collaboration between pharmacists and GPs in Dutch primary care, Dutch pharmacists  
32 routinely request an extensive summary of the electronic patient's medical records from the GP to  
33 perform a medication review, it is possible that some pharmacists did not do this. We performed a  
34 pragmatic trial and therefore our results reflect "real-world" practice of how medication reviews were  
35 carried out in Dutch health care practice at the time of the study. Third, we followed patients for three  
36 months after the intervention. Possibly, more time may have been necessary to determine the effect of  
37 the intervention. We were not able to collect data about timing of the medication review steps, so in  
38 some cases there may have been delay in performing all steps. But in Dutch primary care, pharmacists  
39 and GP's have an established close collaboration and therefore we believe that long delays were  
40 unlikely. Another argument for a longer follow-up could be that changes in medication use may  
41 require more time, for example withdrawing of medication by step-wise reduction of dosing.  
42 However, there did not seem to be a difference in dosage changes between intervention- and control  
43  
44  
45  
46  
47  
48  
49  
50  
51  
52  
53  
54  
55  
56  
57  
58  
59  
60

1  
2  
3 arm. Finally, one third of all eligible patients were willing to participate in the study. Given the frailty  
4 of this population and the time consuming nature of participation, we think this is a very reasonable  
5 response rate. Nevertheless, our results may not be generalizable to the total population.  
6  
7

### 8 **Comparison with other studies**

9 The medication changes in both arms were comparable. Small changes in different therapeutic  
10 medication groups suggest fluctuations of medication use over time as prescribing is a dynamic -  
11 rather than a static process. We do not know the pattern of fluctuations in anticholinergic and sedative  
12 medication prescribing; this should be explored in longitudinal studies powered to detect changes at  
13 medication level. Our results are in line with a number of meta-analyses, which also reported a lack of  
14 effect of medication reviews on a variety of patient outcomes. [14-16] Our results are in contrast to a  
15 number of studies, which found medication reviews to be effective in specific subgroups of patients  
16 with multiple comorbidities, polypharmacy and pain. [20, 21] The medication reviews in these studies  
17 however were not specifically focusing on medication with anticholinergic and/or sedative properties  
18 as we did. Two small Australian studies suggest that the DBI can be lowered, but these studies were  
19 based on pharmacist recommendations and did not investigate actual implementation of these by the  
20 GP. [11, 12] Although some lowering of the DBI was seen, the latter study did find that GPs had  
21 difficulties in changing medications, for example with those medications initiated by specialists. A  
22 recent study also showed that while it was possible to optimize use for a number of medication classes,  
23 psychotropic medications were among the most difficult to adjust. [42] So, despite guidance how to  
24 reduce anticholinergic and sedative medication, [43-45] as highlighted by our findings, there seem to  
25 be important barriers preventing reduction in clinical practice.  
26  
27  
28  
29  
30  
31  
32  
33  
34

### 35 **Conclusions and implications**

36 Using the DBI, a highly vulnerable population group in need of medication optimization can be  
37 identified. Pharmacist-led medication review as currently performed in the Netherlands did not appear  
38 effective in reducing the DBI. While our study was powered to detect a difference in medication use, it  
39 should be acknowledged that other patient outcomes, like geriatric syndromes (e.g. risk of falls) and  
40 adverse events (e.g. drug-related hospital admission) are very important for the evaluation of  
41 medication review in older patients. Further studies should ensure sufficient sample sizes to study  
42 these outcomes. [46, 47] Despite some practical issues with the DBI, such as the lack of an  
43 international consensus-based list of anticholinergic/sedative medication including minimum doses,  
44 [10] we suggest to use the DBI as a tool to identify harmful medication users. This deprescribing  
45 approach may be suitable for other patient groups and in other settings such as nursing homes or GP  
46 practice with co-located pharmacist. [4, 48-50] Enlarging the multidisciplinary team should also be  
47 considered, for example psychiatrists advising GPs on lowering or ceasing medication and  
48 psychologists assisting patients during withdrawal. Furthermore, signalling a rising load and taking  
49  
50  
51  
52  
53  
54  
55  
56  
57  
58  
59  
60

1  
2  
3 action before chronic use of medication with anticholinergic and/or sedative properties is established  
4 may be the preferred approach.  
5  
6  
7  
8  
9

## 10 **ACKNOWLEDGEMENTS**

11  
12 We thank Marjolein Deurloo, Laura Hellemans and Floor Hulshof for helping with the data collection.  
13  
14

### 15 **Funding**

16 This study was supported by the Dutch Pharmacy Society “Koninklijke Nederlandse Maatschappij ter  
17 bevordering der Pharmacie” (KNMP), grant number 14b.27. The funder had no involvement in the  
18 study design; in the collection, analysis and interpretation of the data; in the writing of the report; and  
19 in the decision to submit the paper for publication.  
20  
21  
22

### 23 **Competing interests**

24 All authors have completed the ICMJE uniform disclosure form  
25 at [www.icmje.org/coi\\_disclosure.pdf](http://www.icmje.org/coi_disclosure.pdf) and declare: no support from any organisation for the submitted  
26 work; no financial relationships with any organisations that might have an interest in the submitted  
27 work in the previous three years; no other relationships or activities that could appear to have  
28 influenced the submitted work.  
29  
30  
31  
32

### 33 **Contributors**

34 KT initiated the study and HW and HGvdM contributed to the study conception, design, and to the  
35 intervention development. HGvdM, HW and KT reviewed the study parameters and contributed to the  
36 analysis plan; obtained ethical approval. KT did randomisation. HGvdM led the trial and collected the  
37 data. HGvdM and HW did the statistical analysis with input from KT. HGvdM, HW, KT and LP  
38 contributed to the interpretation of the results. HGvdM drafted the manuscript. HGvdM, HW, KT and  
39 LP revised and approved the final manuscript. KT is the guarantor.  
40  
41  
42  
43

### 44 **Data sharing**

45 Data are available from corresponding author on request.  
46  
47

### 48 **Ethics approval**

49 This study was approved by the Medical Ethical Committee of the University Medical Centre of  
50 Groningen (protocol number METc 2014/392; in Dutch: Medisch Ethische Toetsingscommissie van  
51 het Universitair Medisch Centrum Groningen [METc UMCG]). Participants provided written  
52 informed consent before participating in the study.  
53  
54  
55  
56  
57  
58  
59  
60

## REFERENCES

- 1 Taxis K, O'Sullivan D, Cullinan S, et al. Drug utilization in older people. In: Elseviers M, Wettermark B, Almarsdóttir A, et al., eds. Drug utilization research: Methods and applications. London: Wiley-Blackwell 2016:259-69.
- 2 Fox C, Smith T, Maidment I, et al. Effect of medications with anti-cholinergic properties on cognitive function, delirium, physical function and mortality: a systematic review. *Age Ageing*2014;43:604-15 doi:10.1093/ageing/afu096 [published Online First: 19 July 2014].
- 3 Park H, Satoh H, Miki A, et al. Medications associated with falls in older people: systematic review of publications from a recent 5-year period. *Eur J Clin Pharmacol*2015;71:1429-40 doi:10.1007/s00228-015-1955-3 [published Online First: 26 September 2015].
- 4 Holvast F, van Hattem BA, Sinnige J, et al. Late-life depression and the association with multimorbidity and polypharmacy: a cross-sectional study. *Fam Pract*2017;34:539-45 doi:10.1093/fampra/cmz018 [published Online First: 23 March 2017].
- 5 Bell JS, Mezrani C, Blacker N, et al. Anticholinergic and sedative medicines - prescribing considerations for people with dementia. *Aust Fam Physician*2012;41:45-9.
- 6 Pont LG, Nielen JT, McLachlan AJ, et al. Measuring anticholinergic drug exposure in older community-dwelling Australian men: a comparison of four different measures. *Br J Clin Pharmacol*2015;80:1169-75 doi:10.1111/bcp.12670 [published Online First: 6 July 2015].
- 7 Cardwell K, Hughes CM, Ryan C. The Association Between Anticholinergic Medication Burden and Health Related Outcomes in the 'Oldest Old': A Systematic Review of the Literature. *Drugs Aging*2015;32:835-48 doi:10.1007/s40266-015-0310-9 [published Online First: 6 October 2015].
- 8 Hilmer SN, Mager DE, Simonsick EM, et al. A drug burden index to define the functional burden of medications in older people. *Arch Intern Med*2007;167:781-7 doi:10.1001/archinte.167.8.781 [published Online First: 23 April 2007].
- 9 Ruxton K, Woodman RJ, Mangoni AA. Drugs with anticholinergic effects and cognitive impairment, falls and all-cause mortality in older adults: A systematic review and meta-analysis. *Br J Clin Pharmacol*2015;80:209-20 doi:10.1016/j.sapharm.2015.11.002 [published Online First: 11 November 2015].
- 10 Wouters H, van der Meer H, Taxis K. Quantification of anticholinergic and sedative drug load with the Drug Burden Index: a review of outcomes and methodological quality of studies. *Eur J Clin Pharmacol*2017;73:257-66 doi:10.1007/s00228-016-2162-6 [published Online First: 1 December 2016].
- 11 Castelino RL, Hilmer SN, Bajorek BV, et al. Drug Burden Index and potentially inappropriate medications in community-dwelling older people: the impact of Home Medicines Review. *Drugs Aging*2010;27:135-48 doi:10.2165/11531560-000000000-00000 [published Online First: 21 September 2012].
- 12 Gnjjidic D, Le Couteur DG, Abernethy DR, et al. A pilot randomized clinical trial utilizing the drug burden index to reduce exposure to anticholinergic and sedative medications in older people. *Ann Pharmacother*2010;44:1725-32 doi:10.1345/aph.1P310 [published Online First: 28 September 2010].

1  
2  
3 13 Medicines optimisation: the safe and effective use of medicines to enable the best possible  
4 outcomes. Available at: [https://www.nice.org.uk/guidance/ng5/chapter/recommendations#patient-](https://www.nice.org.uk/guidance/ng5/chapter/recommendations#patient-decision-aids-used-in-consultations-involving-medicines)  
5 [decision-aids-used-in-consultations-involving-medicines](https://www.nice.org.uk/guidance/ng5/chapter/recommendations#patient-decision-aids-used-in-consultations-involving-medicines). Accessed March, 2018.

6  
7 14 Christensen M, Lundh A. Medication review in hospitalised patients to reduce morbidity and  
8 mortality. *Cochrane Database Syst Rev*2016;2:CD008986 doi:10.1002/14651858.CD008986.pub3  
9 [published Online First: 20 February 2016].

10  
11 15 Holland R, Desborough J, Goodyer L, et al. Does pharmacist-led medication review help to reduce  
12 hospital admissions and deaths in older people? A systematic review and meta-analysis. *Br J Clin*  
13 *Pharmacol*2008;65:303-16 doi:10.1111/j.1365-2125.2007.03071.x [published Online First: 18  
14 December 2007].

15  
16 16 Wallerstedt SM, Kindblom JM, Nylen K, et al. Medication reviews for nursing home residents to  
17 reduce mortality and hospitalization: systematic review and meta-analysis. *Br J Clin*  
18 *Pharmacol*2014;78:488-97 doi:10.1111/bcp.12351 [published Online First: 21 August 2014].

19  
20 17 Kwint HF, Bermingham L, Faber A, et al. The relationship between the extent of collaboration of  
21 general practitioners and pharmacists and the implementation of recommendations arising from  
22 medication review: a systematic review. *Drugs Aging*2013;30:91-102 doi:10.1007/s40266-012-0048-6  
23 [published Online First: 16 January 2013].

24  
25 18 Geurts MM, Talsma J, Brouwers JR, et al. Medication review and reconciliation with cooperation  
26 between pharmacist and general practitioner and the benefit for the patient: a systematic review. *Br J*  
27 *Clin Pharmacol*2012;74:16-33 doi:10.1111/j.1365-2125.2012.04178.x [published Online First: 11  
28 June 2012].

29  
30 19 Hatah E, Braund R, Tordoff J, et al. A systematic review and meta-analysis of pharmacist-led fee-  
31 for-services medication review. *Br J Clin Pharmacol*2014;77:102-15 doi:10.1111/bcp.12140  
32 [published Online First: 18 April 2013].

33  
34 20 Jokanovic N, Tan EC, Sudhakaran S, et al. Pharmacist-led medication review in community  
35 settings: An overview of systematic reviews. *Res Social Adm Pharm*2016;13:661-85  
36 doi:10.1016/j.sapharm.2016.08.005 [published Online First: 20160828].

37  
38 21 Hadi MA, Alldred DP, Briggs M, et al. Effectiveness of pharmacist-led medication review in  
39 chronic pain management: systematic review and meta-analysis. *Clin J Pain*2014;30:1006-14  
40 doi:10.1097/AJP.000000000000063 [published Online First: 1 November 2012].

41  
42 22 Teichert M, Schoenmakers T, Kylstra N, et al. Quality indicators for pharmaceutical care: a  
43 comprehensive set with national scores for Dutch community pharmacies. *Int J Clin*  
44 *Pharm*2016;38:870-9 doi:10.1007/s11096-016-0301-x [published Online First: 23 April 2016].

45  
46 23 Buurma H, Bouvy ML, De Smet PA, et al. Prevalence and determinants of pharmacy shopping  
47 behaviour. *J Clin Pharm Ther*2008;33:17-23 doi:10.1111/j.1365-2710.2008.00878.x [published  
48 Online First: 17 January 2008].

49  
50 24 Kwint HF, Faber A, Gussekloo J, et al. Completeness of medication reviews provided by  
51 community pharmacists. *J Clin Pharm Ther*2014;39:248-52 doi:10.1111/jcpt.12132 [published Online  
52 First: 13 February 2014].

53  
54 25 Nederlands Huisartsen Genootschap (NHG) [Multidisciplinary guideline on polypharmacy in older  
55 individuals], Utrecht 2012. Available at:



- 1  
2  
3 [https://www.nhg.org/sites/default/files/content/nhg\\_org/uploads/polyfarmacie\\_bij\\_ouderen.pdf](https://www.nhg.org/sites/default/files/content/nhg_org/uploads/polyfarmacie_bij_ouderen.pdf).  
4 Accessed August, 2015.  
5  
6 26 ATC/DDD Index. Available at: [https://www.whooc.no/atc\\_ddd\\_index/](https://www.whooc.no/atc_ddd_index/). Accessed March, 2017.  
7  
8 27 van der Meer HG, Wouters H, van Hulten R, et al. Decreasing the load? Is a Multidisciplinary  
9 Multistep Medication Review in older people an effective intervention to reduce a patient's Drug  
10 Burden Index? Protocol of a randomised controlled trial. *BMJ Open*2015;5:e009213  
11 doi:10.1136/bmjopen-2015-009213.  
12  
13 28 Farmacotherapeutisch Kompas. [Dutch pharmacotherapeutic reference source]. Available at:  
14 <https://www.farmacotherapeutischkompas.nl/>. Accessed Aug, 2015.  
15  
16 29 KNMP Kennisbank. [Dutch pharmacotherapeutic reference source]. Available at:  
17 <https://kennisbank.knmp.nl/>. Accessed Aug, 2015.  
18  
19 30 Expertisecentrum farmacotherapie bij ouderen (EPHOR). [Dutch reference source for  
20 pharmacotherapy in older people]. Available at: <http://www.ephor.nl/pdf/Ephors-rapporten>. Accessed  
21 Aug, 2015.  
22  
23 31 Lingjaerde O, Ahlfors UG, Bech P, et al. The UKU side effect rating scale. A new comprehensive  
24 rating scale for psychotropic drugs and a cross-sectional study of side effects in neuroleptic-treated  
25 patients. *Acta Psychiatr Scand Suppl*1987;334:1-100 doi:10.1111/j.1600-0447.1987.tb10566.x.  
26  
27 32 de Vries ST, Haaijer-Ruskamp FM, de Zeeuw D, et al. Construct and concurrent validity of a  
28 patient-reported adverse drug event questionnaire: a cross-sectional study. *Health Qual Life*  
29 *Outcomes*2014;12:103 doi:10.1186/s12955-014-0103-6 [published Online First: 13 August 2014].  
30  
31 33 Podsiadlo D, Richardson S. The timed "Up & Go": a test of basic functional mobility for frail  
32 elderly persons. *J Am Geriatr Soc*1991;39:142-8 doi:10.1111/j.1532-5415.1991.tb01616.x.  
33  
34 34 Solomon PR, Hirschhoff A, Kelly B, et al. A 7 minute neurocognitive screening battery highly  
35 sensitive to Alzheimer's disease. *Arch Neurol*1998;55:349-55 doi:10.1001/archneur.55.3.349.  
36  
37 35 Reitan RM. The relation of the trail making test to organic brain damage. *J Consult*  
38 *Psychol*1955;19:393-4 doi:10.1037/h0044509.  
39  
40 36 Wechsler D. Wechsler Adult Intelligence Scale. San Antonio: The Psychological Corporation  
41 1997.  
42  
43 37 Kempen GI, Suurmeijer TP. The development of a hierarchical polychotomous ADL-IADL scale  
44 for noninstitutionalized elders. *Gerontologist*1990;30:497-502 doi:10.1093/geront/30.4.497.  
45  
46 38 Kempen GI, Miedema I, Ormel J, et al. The assessment of disability with the Groningen Activity  
47 Restriction Scale. Conceptual framework and psychometric properties. *Soc Sci Med*1996;43:1601-10  
48 doi:10.1016/S0277-9536(96)00057-3.  
49  
50 39 EuroQol EQ-5D-3L. Available at: [www.euroqol.org](http://www.euroqol.org). Accessed Aug, 2014.  
51  
52 40 Cohen J. A power primer. *Psychol Bull*1992;112:155-9 doi:10.1037/0033-2909.112.1.155.  
53  
54 41 Torgerson DJ. Contamination in trials: is cluster randomisation the answer?. *BMJ*2001;322:355-7  
55 doi:10.1136/bmj.322.7282.355 [published Online First: 10 February 2001].  
56  
57  
58  
59

1  
2  
3 42 Guthrie B, Kavanagh K, Robertson C, et al. Data feedback and behavioural change intervention to  
4 improve primary care prescribing safety (EFIPPS): multicentre, three arm, cluster randomised  
5 controlled trial. *BMJ*2016;354:i4079 doi:10.1136/bmj.i4079 [published Online First: 18 August 2016].  
6

7 43 Gould RL, Coulson MC, Patel N, et al. Interventions for reducing benzodiazepine use in older  
8 people: meta-analysis of randomised controlled trials. *Br J Psychiatry*2014;204:98-107  
9 doi:10.1192/bjp.bp.113.126003.

10 44 Tay HS, Soiza RL, Mangoni AA. Minimizing anticholinergic drug prescribing in older hospitalized  
11 patients: a full audit cycle. *Ther Adv Drug Saf*2014;5:121-8 doi:10.1177/2042098614523638  
12 [published Online First: 13 February 2014].  
13

14 45 Bpac nz. A practical guide to STOPPING MEDICINES in Older People. *BPJ* 2010;27(27).  
15 <https://bpac.org.nz/BPJ/2010/April/stopguide.aspx>.  
16

17 46 Beuscart JB, Pont LG, Thevelin S, et al. A systematic review of the outcomes reported in trials of  
18 medication review in older patients: the need for a core outcome set. *Br J Clin*  
19 *Pharmacol*2017;83:942-52 doi:10.1111/bcp.13197 [published Online First: 20170118].  
20

21 47 Granas AG, Stendal Bakken M, Ruths S, et al. Deprescribing for frail older people - Learning from  
22 the case of Mrs. Hansen. *Res Social Adm Pharm*2017 doi:S1551-7411(17)30588-0 [pii] [published  
23 Online First: 20170713].  
24

25 48 van der Meer HG, Taxis K, Pont LG. Changes in Prescribing Symptomatic and Preventive  
26 Medications in the Last Year of Life in Older Nursing Home Residents. *Front Pharmacol*2018;8:990  
27 doi:10.3389/fphar.2017.00990 [published Online First: 20180123].  
28

29 49 Wouters H, Scheper J, Koning H, et al. Discontinuing inappropriate medication use in nursing  
30 home residents: A cluster randomized controlled trial. *Ann Intern Med* 2017;167:609-17  
31 doi:10.7326/M16-2729.  
32

33 50 Hazen AC, Sloeserwij VM, Zwart DL, et al. Design of the POINT study: Pharmacotherapy  
34 Optimisation through Integration of a Non-dispensing pharmacist in a primary care Team (POINT).  
35 *BMC Fam Pract*2015;16:76 doi:10.1186/s12875-015-0296-8 [published Online First: 2 June 2015].  
36  
37  
38  
39  
40  
41  
42  
43  
44  
45  
46  
47  
48  
49  
50  
51  
52  
53  
54  
55  
56  
57  
58  
59  
60

1  
2  
3  
4  
5  
6  
7  
8  
9  
10  
11  
12  
13  
14  
15  
16  
17  
18  
19  
20  
21  
22  
23  
24  
25  
26  
27  
28  
29  
30  
31  
32  
33  
34  
35  
36  
37  
38  
39  
40  
41  
42  
43  
44  
45  
46  
47  
48  
49  
50  
51  
52  
53  
54  
55  
56  
57  
58  
59  
60

Figure 1: Participant flow

\*All patients who had a baseline measurement.

†All patients who were not lost to follow-up and received the intervention as allocated.

For peer review only



Figure 1: Participant flow/ \*All patients who had a baseline measurement.  
†All patients who were not lost to follow-up and received the intervention as allocated.

168x156mm (300 x 300 DPI)



Appendix table 1: Secondary outcomes distribution and treatment in our study.

| Outcome                           | Description of test                                                                                                                                                                                                                                | Measurement scale               | Best-worst score achievable | Best-worst score measured | Distribution    | Transformation | Cut-off points | Regression type | Reporting                   |
|-----------------------------------|----------------------------------------------------------------------------------------------------------------------------------------------------------------------------------------------------------------------------------------------------|---------------------------------|-----------------------------|---------------------------|-----------------|----------------|----------------|-----------------|-----------------------------|
| <b>Cognitive function</b>         |                                                                                                                                                                                                                                                    |                                 |                             |                           |                 |                |                |                 |                             |
| Trailmaking Test A                | Connecting a series of numbers in the correct increasing order.                                                                                                                                                                                    | Time in seconds to complete     | 1-300                       | 26-202                    | Left skewed     | logarithmic    | N/A            | linear          | median (IQR)                |
| Trailmaking Test B                | Connecting numbers and letters in the correct increasing order while alternating between numbers and letters e.g. 1-A-2-B-3-...etc.                                                                                                                | Time in seconds to complete     | 1-600                       | 55-439                    | Left skewed     | logarithmic    | N/A            | linear          | median (IQR)                |
| DSST                              | Matching of the correct symbol to the correct number for multiple arrays of numbers using a legend displayed above.                                                                                                                                | Number of symbols correct       | 133-0                       | 75-7                      | Normal          | 5% classes     | N/A            | linear          | mean (SD)                   |
| 7MS enhanced cued recall          | Recalling 16 pictures that participants encoded using cues presented by examiner (e.g. I show you four pictures, which one is a piece of furniture?) followed by cued recall using these cues (e.g. "what piece of furniture did I just show you?) | Number of items recalled        | 16-0                        | 16-5                      | Ceiling effects | dichotomized   | 15             | logistic        | % (n) in best scoring group |
| 7MS Benton temporal orientation   | Assessing patient's time orientation.                                                                                                                                                                                                              | Number of error points          | 0-113                       | 0-106                     | Floor effects   | dichotomized   | 5              | logistic        | % (n) in best scoring group |
| 7MS clock drawing                 | Drawing a circle with a clock face including all the numbers and setting the hands to twenty to four.                                                                                                                                              | Number of correct items drawn   | 7-0                         | 7-1                       | Ceiling effects | dichotomized   | 6              | logistic        | % (n) in best scoring group |
| 7MS category fluency              | Naming as many animals as possible in 60 seconds.                                                                                                                                                                                                  | Number of animal names produced | 45-0                        | 32-5                      | Normal          | N/A            | N/A            | linear          | mean (SD)                   |
| <b>Activities of daily living</b> |                                                                                                                                                                                                                                                    |                                 |                             |                           |                 |                |                |                 |                             |

|                                      |                                                                                                                         |                                 |           |            |                   |              |     |                   |                             |
|--------------------------------------|-------------------------------------------------------------------------------------------------------------------------|---------------------------------|-----------|------------|-------------------|--------------|-----|-------------------|-----------------------------|
| Groningen Activity Restriction Scale | Questionnaire assessing problems with activities in daily living e.g. dressing oneself and climbing the stairs.         | Severity of problems            | 18-72     | 18-66      | Left skewed       | dichotomized | 36  | logistic          | % (n) in best scoring group |
| <b>Side effects</b>                  |                                                                                                                         |                                 |           |            |                   |              |     |                   |                             |
| Sedative side effects                | Questionnaire assessing sedative side effects.                                                                          | Severity/number of side effects | 0-14      | 0-12       | Negative binomial | N/A          | N/A | negative binomial | median (IQR)                |
| UKU                                  | Questionnaire assessing anticholinergic side effects.                                                                   | Severity/number of side effects | 0-144     | 0-84       | Negative binomial | N/A          | N/A | negative binomial | median (IQR)                |
| <b>Quality of life</b>               |                                                                                                                         |                                 |           |            |                   |              |     |                   |                             |
| EQ-5D-3L                             | Assessing quality of life with regard to mobility, self-care, usual activities, pain discomfort and anxiety/depression. | Utilities                       | 1-0       | 1-(-)0.204 | Right skewed      | dichotomized | 0,5 | logistic          | % (n) in best scoring group |
| EQ-5D-3L: Visual Analogue Scale      | Assessing self-related health state on a vertical visual analogue scale.                                                | Points on scale                 | 10-0      | 10-2       | Normal            | N/A          | N/A | linear            | mean (SD)                   |
| <b>Risk of falls</b>                 |                                                                                                                         |                                 |           |            |                   |              |     |                   |                             |
| Up&Go test                           | Stand up from a chair, walk 3m, turn around and sit down.                                                               | Time in seconds                 | <15 - ≥15 | 6-43       | Dichotomous       | ≥15          | N/A | logistic          | % (n) in best scoring group |

Appendix table 2: Sensitivity analysis of proportion of patients having a decrease in DBI  $\geq 0.5$ 

|                                       | Proportion with decrease of DBI $\geq 0.5$ , n/N (%) |              | Odds ratio (95% CI) * | p-value |
|---------------------------------------|------------------------------------------------------|--------------|-----------------------|---------|
|                                       | Intervention                                         | Control      |                       |         |
| DBI > 1.5                             | 12/64 (18.8)                                         | 13/78 (16.7) | 1.15 (0.49 to 2.74)   | 0.746   |
| DBI < 6                               | 12/64 (18.8)                                         | 13/79 (16.5) | 1.17 (0.49 to 2.78)   | 0.720   |
| Number of medications at baseline >5  | 12/61 (19.7)                                         | 12/78 (15.4) | 1.35 (0.56 to 3.25)   | 0.508   |
| Number of medications at baseline <20 | 12/65 (18.5)                                         | 13/79 (16.5) | 1.15 (0.48 to 2.73)   | 0.752   |
| Age >66                               | 12/65 (18.5)                                         | 12/77 (15.6) | 1.23 (0.51 to 2.95)   | 0.649   |
| Age <93                               | 12/64 (18.8)                                         | 13/79 (16.5) | 1.17 (0.49 to 2.78)   | 0.720   |

\* Binary logistic regression, unadjusted, according to second analysis.

Appendix table 3: Patients who had medications started, stopped and changed in dose at follow-up in intervention- and control arm.

| ATC code class                                                      | Intervention (n=65)    |                        | Control (n=80)         |                        |
|---------------------------------------------------------------------|------------------------|------------------------|------------------------|------------------------|
|                                                                     | DBI medication (% , n) | All medication (% , n) | DBI medication (% , n) | All medication (% , n) |
| <b>Started</b>                                                      |                        |                        |                        |                        |
| A (alimentary tract and metabolism)                                 | 7.7 (5)                | 20.0 (13)              | 3.7 (3)                | 11.3 (9)               |
| R (respiratory system)                                              | 4.6 (3)                | 12.3 (8)               | 3.7 (3)                | 7.5 (6)                |
| N (nervous system)                                                  | 4.6 (3)                | 6.2 (4)                | 3.7 (3)                | 7.5 (6)                |
| M (musculo-skeletal system)                                         | 0 (0)                  | 6.2 (4)                | 3.7 (3)                | 5.0 (4)                |
| C (cardiovascular system)                                           | 4.6 (3)                | 6.2 (4)                | 1.3 (1)                | 2.5 (2)                |
| B (blood and blood forming organs)                                  | 0 (0)                  | 10.8 (7)               | 0 (0)                  | 7.5 (6)                |
| L (antineoplastic and immune-modulating agents)                     | 1.5 (1)                | 3.1 (2)                | 0 (0)                  | 0 (0)                  |
| H (systemic hormonal preparations, excl. sex hormones and insulins) | 0 (0)                  | 1.5 (1)                | 0 (0)                  | 0 (0)                  |
| G (genito urinary system and sex hormones)                          | 0 (0)                  | 0 (0)                  | 1.3 (1)                | 1.3 (1)                |
| S (sensory organs)                                                  | 0 (0)                  | 0 (0)                  | 0 (0)                  | 1.3 (1)                |
| Total*                                                              | 20.0 (13)              | 43.1 (28)              | 13.8 (11)              | 33.8 (27)              |
| <b>Stopped</b>                                                      |                        |                        |                        |                        |
| A (alimentary tract and metabolism)                                 | 9.2 (6)                | 21.5 (14)              | 2.5 (2)                | 6.3 (5)                |
| N (nervous system)                                                  | 13.8 (9)               | 15.4 (10)              | 12.5 (10)              | 15.0 (12)              |
| C (cardiovascular system)                                           | 6.2 (4)                | 9.2 (6)                | 7.5 (6)                | 10.0 (8)               |
| B (blood and blood forming organs)                                  | 0 (0)                  | 9.2 (6)                | 0 (0)                  | 6.3 (5)                |
| R (respiratory system)                                              | 0 (0)                  | 7.7 (5)                | 3.7 (3)                | 13.8 (11)              |
| M (musculo-skeletal system)                                         | 3.1 (2)                | 4.6 (3)                | 5.0 (4)                | 5.0 (4)                |
| G (genito urinary system and sex hormones)                          | 3.1 (2)                | 4.6 (3)                | 1.3 (1)                | 1.3 (1)                |
| D (dermatologicals)                                                 | 0 (0)                  | 1.5 (1)                | 0 (0)                  | 0 (0)                  |
| H (systemic hormonal preparations, excl. sex hormones and insulins) | 0 (0)                  | 0 (0)                  | 0 (0)                  | 2.4 (2)                |
| L (antineoplastic and immune-modulating agents)                     | 0 (0)                  | 0 (0)                  | 1.3 (1)                | 1.3 (1)                |
| S (sensory organs)                                                  | 0 (0)                  | 0 (0)                  | 0 (0)                  | 1.3 (1)                |
| Total*                                                              | 30.8 (20)              | 46.2 (30)              | 22.5 (18)              | 41.3 (33)              |
| <b>Dose change</b>                                                  |                        |                        |                        |                        |
| N (nervous system)                                                  | 21.5 (14)              | 23.1 (15)              | 21.3 (17)              | 22.5 (18)              |
| C (cardiovascular system)                                           | 10.8 (7)               | 15.4 (10)              | 1.3 (1)                | 2.5 (2)                |
| A (alimentary tract and metabolism)                                 | 1.5 (1)                | 4.6 (3)                | 3.7 (3)                | 3.8 (3)                |
| R (respiratory system)                                              | 0 (0)                  | 1.5 (1)                | 1.3 (1)                | 1.3 (1)                |
| B (blood and blood forming organs)                                  | 0 (0)                  | 1.5 (1)                | 0 (0)                  | 0 (0)                  |
| M (musculo-skeletal system)                                         | 0 (0)                  | 1.5 (1)                | 0 (0)                  | 0 (0)                  |
| H (systemic hormonal preparations, excl. sex hormones and insulins) | 0 (0)                  | 0 (0)                  | 0 (0)                  | 3.8 (3)                |
| J (anti-infectives for systemic use)                                | 0 (0)                  | 0 (0)                  | 1.3 (1)                | 1.3 (1)                |
| Total*                                                              | 27.7 (18)              | 38.5 (25)              | 23.8 (19)              | 28.0 (23)              |
| <b>Total interventions</b>                                          | <b>53.8 (35)</b>       | <b>72.3 (47)</b>       | <b>45.0 (36)</b>       | <b>66.3 (53)</b>       |

ATC = Anatomical Therapeutic Chemical, classification by the WHO Collaborating Centre for Drug Statistics Methodology. Based on second analysis. \*Not sum of subtotals, as some patients had several interventions.



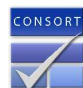

## CONSORT 2010 checklist of information to include when reporting a randomised trial\*

| Section/Topic                    | Item No | Checklist item                                                                                                                                                                              | Reported on page No |
|----------------------------------|---------|---------------------------------------------------------------------------------------------------------------------------------------------------------------------------------------------|---------------------|
| <b>Title and abstract</b>        |         |                                                                                                                                                                                             |                     |
|                                  | 1a      | Identification as a randomised trial in the title                                                                                                                                           | 1                   |
|                                  | 1b      | Structured summary of trial design, methods, results, and conclusions (for specific guidance see CONSORT for abstracts)                                                                     | 2-3                 |
| <b>Introduction</b>              |         |                                                                                                                                                                                             |                     |
| Background and objectives        | 2a      | Scientific background and explanation of rationale                                                                                                                                          | 4                   |
|                                  | 2b      | Specific objectives or hypotheses                                                                                                                                                           | 4                   |
| <b>Methods</b>                   |         |                                                                                                                                                                                             |                     |
| Trial design                     | 3a      | Description of trial design (such as parallel, factorial) including allocation ratio                                                                                                        | 4-5                 |
|                                  | 3b      | Important changes to methods after trial commencement (such as eligibility criteria), with reasons                                                                                          | N/A                 |
| Participants                     | 4a      | Eligibility criteria for participants                                                                                                                                                       | 5                   |
|                                  | 4b      | Settings and locations where the data were collected                                                                                                                                        | 4-5                 |
| Interventions                    | 5       | The interventions for each group with sufficient details to allow replication, including how and when they were actually administered                                                       | 5-6                 |
| Outcomes                         | 6a      | Completely defined pre-specified primary and secondary outcome measures, including how and when they were assessed                                                                          | 6-7                 |
|                                  | 6b      | Any changes to trial outcomes after the trial commenced, with reasons                                                                                                                       | N/A                 |
| Sample size                      | 7a      | How sample size was determined                                                                                                                                                              | 7                   |
|                                  | 7b      | When applicable, explanation of any interim analyses and stopping guidelines                                                                                                                | N/A                 |
| <b>Randomisation:</b>            |         |                                                                                                                                                                                             |                     |
| Sequence generation              | 8a      | Method used to generate the random allocation sequence                                                                                                                                      | 5                   |
|                                  | 8b      | Type of randomisation; details of any restriction (such as blocking and block size)                                                                                                         | 5                   |
| Allocation concealment mechanism | 9       | Mechanism used to implement the random allocation sequence (such as sequentially numbered containers), describing any steps taken to conceal the sequence until interventions were assigned | 5                   |
| Implementation                   | 10      | Who generated the random allocation sequence, who enrolled participants, and who assigned participants to interventions                                                                     | 5                   |
| Blinding                         | 11a     | If done, who was blinded after assignment to interventions (for example, participants, care providers, those                                                                                | 5                   |

|                                                      |     |                                                                                                                                                   |                |
|------------------------------------------------------|-----|---------------------------------------------------------------------------------------------------------------------------------------------------|----------------|
|                                                      |     | assessing outcomes) and how                                                                                                                       |                |
|                                                      | 11b | If relevant, description of the similarity of interventions                                                                                       | N/A            |
| Statistical methods                                  | 12a | Statistical methods used to compare groups for primary and secondary outcomes                                                                     | 7-8            |
|                                                      | 12b | Methods for additional analyses, such as subgroup analyses and adjusted analyses                                                                  | 7-8            |
| <b>Results</b>                                       |     |                                                                                                                                                   |                |
| Participant flow (a diagram is strongly recommended) | 13a | For each group, the numbers of participants who were randomly assigned, received intended treatment, and were analysed for the primary outcome    | 8-9            |
|                                                      | 13b | For each group, losses and exclusions after randomisation, together with reasons                                                                  | 7-8 + figure 1 |
| Recruitment                                          | 14a | Dates defining the periods of recruitment and follow-up                                                                                           | 4              |
|                                                      | 14b | Why the trial ended or was stopped                                                                                                                | N/A            |
| Baseline data                                        | 15  | A table showing baseline demographic and clinical characteristics for each group                                                                  | 9              |
| Numbers analysed                                     | 16  | For each group, number of participants (denominator) included in each analysis and whether the analysis was by original assigned groups           | 8-9 + figure 1 |
| Outcomes and estimation                              | 17a | For each primary and secondary outcome, results for each group, and the estimated effect size and its precision (such as 95% confidence interval) | 9-11           |
|                                                      | 17b | For binary outcomes, presentation of both absolute and relative effect sizes is recommended                                                       | 9-11           |
| Ancillary analyses                                   | 18  | Results of any other analyses performed, including subgroup analyses and adjusted analyses, distinguishing pre-specified from exploratory         | 9-11           |
| Harms                                                | 19  | All important harms or unintended effects in each group (for specific guidance see CONSORT for harms)                                             | N/A            |
| <b>Discussion</b>                                    |     |                                                                                                                                                   |                |
| Limitations                                          | 20  | Trial limitations, addressing sources of potential bias, imprecision, and, if relevant, multiplicity of analyses                                  | 11-12          |
| Generalisability                                     | 21  | Generalisability (external validity, applicability) of the trial findings                                                                         | 12-13          |
| Interpretation                                       | 22  | Interpretation consistent with results, balancing benefits and harms, and considering other relevant evidence                                     | 12-13          |
| <b>Other information</b>                             |     |                                                                                                                                                   |                |
| Registration                                         | 23  | Registration number and name of trial registry                                                                                                    | 3              |
| Protocol                                             | 24  | Where the full trial protocol can be accessed, if available                                                                                       | 5              |
| Funding                                              | 25  | Sources of funding and other support (such as supply of drugs), role of funders                                                                   | 14             |

\*We strongly recommend reading this statement in conjunction with the CONSORT 2010 Explanation and Elaboration for important clarifications on all the items. If relevant, we also recommend reading CONSORT extensions for cluster randomised trials, non-inferiority and equivalence trials, non-pharmacological treatments, herbal interventions, and pragmatic trials. Additional extensions are forthcoming: for those and for up to date references relevant to this checklist, see [www.consort-statement.org](http://www.consort-statement.org).
