# Supplementary material for: Reducing the anticholinergic and sedative load in older patients on polypharmacy by pharmacist-led medication review: a randomised controlled trial
Source: PubMed Central journal article supplement — BMJ Open. 2018 Jul 19;8(7):e019042. doi: 10.1136/bmjopen-2017-019042 (PMC6059312; doi:10.1136/bmjopen-2017-019042), 2018-07-19
Supplement: bmjopen-2017-019042supp001.pdf [file bmjopen-2017-019042supp001.pdf]

Appendix table 1: Secondary outcomes distribution and treatment in our study.

| Outcome                           | Description of test                                                                                                                                                                                                                               | Measurement scale               | Best-worst score achievable | Best-worst score measured | Distribution    | Transformation | Cut-off points | Regression type | Reporting                   |
|-----------------------------------|---------------------------------------------------------------------------------------------------------------------------------------------------------------------------------------------------------------------------------------------------|---------------------------------|-----------------------------|---------------------------|-----------------|----------------|----------------|-----------------|-----------------------------|
| <b>Cognitive function</b>         |                                                                                                                                                                                                                                                   |                                 |                             |                           |                 |                |                |                 |                             |
| Trailmaking Test A                | Connecting a series of numbers in the correct increasing order.                                                                                                                                                                                   | Time in seconds to complete     | 1-300                       | 26-202                    | Left skewed     | logarithmic    | N/A            | linear          | median (IQR)                |
| Trailmaking Test B                | Connecting numbers and letters in the correct increasing order while alternating between numbers and letters e.g. 1-A-2-B-3-...etc.                                                                                                               | Time in seconds to complete     | 1-600                       | 55-439                    | Left skewed     | logarithmic    | N/A            | linear          | median (IQR)                |
| DSST                              | Matching of the correct symbol to the correct number for multiple arrays of numbers using a legend displayed above.                                                                                                                               | Number of symbols correct       | 133-0                       | 75-7                      | Normal          | 5% classes     | N/A            | linear          | mean (SD)                   |
| 7MS enhanced cued recall          | Recalling 16 pictures that participants encoded using cues presented by examiner (e.g. I show you four pictures, which one is a piece of furniture?) followed by cued recall using these cues (e.g. "what piece of furniture did I just show you? | Number of items recalled        | 16-0                        | 16-5                      | Ceiling effects | dichotomized   | 15             | logistic        | % (n) in best scoring group |
| 7MS Benton temporal orientation   | Assessing patient's time orientation.                                                                                                                                                                                                             | Number of error points          | 0-113                       | 0-106                     | Floor effects   | dichotomized   | 5              | logistic        | % (n) in best scoring group |
| 7MS clock drawing                 | Drawing a circle with a clock face including all the numbers and setting the hands to twenty to four.                                                                                                                                             | Number of correct items drawn   | 7-0                         | 7-1                       | Ceiling effects | dichotomized   | 6              | logistic        | % (n) in best scoring group |
| 7MS category fluency              | Naming as many animals as possible in 60 seconds.                                                                                                                                                                                                 | Number of animal names produced | 45-0                        | 32-5                      | Normal          | N/A            | N/A            | linear          | mean (SD)                   |
| <b>Activities of daily living</b> |                                                                                                                                                                                                                                                   |                                 |                             |                           |                 |                |                |                 |                             |

|                                      |                                                                                                                         |                                 |           |            |                   |              |     |                   |                             |
|--------------------------------------|-------------------------------------------------------------------------------------------------------------------------|---------------------------------|-----------|------------|-------------------|--------------|-----|-------------------|-----------------------------|
| Groningen Activity Restriction Scale | Questionnaire assessing problems with activities in daily living e.g. dressing oneself and climbing the stairs.         | Severity of problems            | 18-72     | 18-66      | Left skewed       | dichotomized | 36  | logistic          | % (n) in best scoring group |
| <b>Side effects</b>                  |                                                                                                                         |                                 |           |            |                   |              |     |                   |                             |
| Sedative side effects                | Questionnaire assessing sedative side effects.                                                                          | Severity/number of side effects | 0-14      | 0-12       | Negative binomial | N/A          | N/A | negative binomial | median (IQR)                |
| UKU                                  | Questionnaire assessing anticholinergic side effects.                                                                   | Severity/number of side effects | 0-144     | 0-84       | Negative binomial | N/A          | N/A | negative binomial | median (IQR)                |
| <b>Quality of life</b>               |                                                                                                                         |                                 |           |            |                   |              |     |                   |                             |
| EQ-5D-3L                             | Assessing quality of life with regard to mobility, self-care, usual activities, pain discomfort and anxiety/depression. | Utilities                       | 1-0       | 1-(-)0.204 | Right skewed      | dichotomized | 0,5 | logistic          | % (n) in best scoring group |
| EQ-5D-3L: Visual Analogue Scale      | Assessing self-related health state on a vertical visual analogue scale.                                                | Points on scale                 | 10-0      | 10-2       | Normal            | N/A          | N/A | linear            | mean (SD)                   |
| <b>Risk of falls</b>                 |                                                                                                                         |                                 |           |            |                   |              |     |                   |                             |
| Up&Go test                           | Stand up from a chair, walk 3m, turn around and sit down.                                                               | Time in seconds                 | <15 - ≥15 | 6-43       | Dichotomous       | ≥15          | N/A | logistic          | % (n) in best scoring group |
